# Supplementary material for: Assessing Microplastic Prevalence and Dispersion from Saigon Urban Canals via Can Gio Mangrove Reserve to East Sea by Raman Scattering Microscopy
Source: MDPI journal article supplement (doi:10.3390/microplastics1030038), 2022-09-05
Supplement: s1 [file s1]

## Assessing microplastic prevalence and dispersion from Saigon urban canals via Can Gio Mangrove Reserve to East Sea by Raman scattering microscopy

Vo Thi Kim Khuyen<sup>1\*</sup>, Dinh Vu Le<sup>2</sup>, Le Hung Anh<sup>3\*</sup>, Axel René Fischer<sup>1</sup>, Christina Dornack<sup>\*1</sup>

### SUPPLEMENTARY MATERIALS

Table S1. Sampling information and abundance of microplastics (MPs/L) at sampling sites

| Locations                                                                            | Mark on the map | Coordinates                            | Sampling from    | Sampling Volume (L) | Abundance (items/L)  |
|--------------------------------------------------------------------------------------|-----------------|----------------------------------------|------------------|---------------------|----------------------|
| <b>Saigon River (SGR) and its main urban canals (freshwater) in Ho-Chi-Minh City</b> |                 |                                        |                  |                     |                      |
| <b>Nhieu Loc – Thi Nghe Canal</b>                                                    |                 |                                        |                  | <b>45</b>           | <b>35.58 ± 4.75</b>  |
| Bridge No. 1 (Upstream of NL-TN canal)                                               | SG1             | 10.7933, 106.6593                      | Boat, river bank | 5                   | 45.89 ± 24.04        |
| Tran Quang Dieu Bridge                                                               | SG2             | 10.7843, 106.6782                      | Boat             | 5                   | 36 ± 11.52           |
| Nhieu Loc                                                                            | SG3             | 10.7880, 106.6835                      | River bank       | 5                   | 27.5 ± 8.54          |
| Hoang Hoa Tham Bridge                                                                | SG4             | 10.7949, 106.6933                      | Boat             | 5                   | 26.67 ± 12.02        |
| Bui Huu Nghia Bridge                                                                 | SG5             | 10.7938, 106.6980                      | Boat             | 5                   | 58.25 ± 5.45         |
| Thi Nghe                                                                             | SG6             | 10.7921, 106.7057                      | Boat, river bank | 5                   | 33.85 ± 8.51         |
| Bach Ðang Wharf (estuary of SGR)                                                     | SG7             | 10.7760, 106.7070                      | Pier             | 10                  | 21.08 ± 4.69         |
| <b>SG Tau Hu Canal</b>                                                               |                 |                                        |                  | <b>25</b>           | <b>45.19 ± 10.30</b> |
| Lo Gom Canal                                                                         | SG8             | 10.7407, 106.6454                      | River bank       | 5                   | 53.75 ± 24.01        |
| Cha Va Bridge                                                                        | SG9             | 10.7486, 106.6602                      | River bank       | 5                   | 44.83 ± 12.86        |
| Letter Y Bridge                                                                      | SG10            | 10.7514, 106.6836                      | Bridge           | 5                   | 45.71 ± 14.57        |
| Nguyen Van Cu Bridge                                                                 | SG11            | 10.7529, 106.6868                      | Bridge           | 10                  | 36.45 ± 7.44         |
| <b>Kenh Te Canal (includes Nguyen Van Cu Bridge)</b>                                 |                 |                                        |                  | <b>20</b>           | <b>43.41 ± 7.93</b>  |
| Kenh Te Bridge                                                                       | SG12            | 10.7529, 106.7015                      | Bridge           | 10                  | 58.5 ± 23.0          |
| Tan Thuan II Bridge (estuary of SGR)                                                 | SG13            | 10.7552, 106.7196                      | River bank       | 10                  | 27.3 ± 5.7           |
| <b>Ben Nghe Canal (includes Nguyen Van Cu Bridge)</b>                                |                 |                                        |                  | <b>20</b>           | <b>33.83 ± 10.54</b> |
| Mong Bridge                                                                          | SG14            | 10.7681, 106.7037                      | Bridge           | 10                  | 33.38 ± 1.74         |
| Khanh Hoi Bridge (estuary of SGR)                                                    | SG15            | 10.7691, 106.7058                      | River bank       | 10                  | 27 ± 3.05            |
| <b>UNESCO Can Gio Mangrove Biosphere Reserve (brackish seawater)</b>                 |                 |                                        |                  |                     |                      |
| <b>Can Gio Mangrove – Transition Zone</b>                                            |                 |                                        |                  | <b>90</b>           | <b>10.45 ± 3.67</b>  |
| Binh Khanh                                                                           | CT1             | 10.6744, 106.7678<br>10.6697, 106.7806 | Ferry            | 10                  | 16.14 ± 7.38         |
| Rach La Bridge                                                                       | CT2             | 10.6017, 106.8192                      | Bridge           | 10                  | 6.67 ± 1.89          |
| An Nghia Bridge (Long Tau River)                                                     | CT3             | 10.5845, 106.8255<br>10.5818, 106.8330 | Bridge<br>Boat   | 10                  | 8.64 ± 1.32          |
| Intersection of Ðong Tranh and Long Tau rivers (border of Ðong Nai and HCMC)         | CT4             | 10.6278, 106.8380                      | Boat             | 10                  | 14.12 ± 1.96         |

|                                                                      |     |                                        |                                                       |           |                     |
|----------------------------------------------------------------------|-----|----------------------------------------|-------------------------------------------------------|-----------|---------------------|
| Ly Nhon<br>Vam Sat Bridge<br>(Soai Rap River)                        | CT5 | 10.4948, 106.7560<br>10.5368, 106.7665 | Bridge<br>Land                                        | 10        | 13.54 ± 3.14        |
| Can Thanh<br>Wharf                                                   | CT6 | 10.4133, 106.9676<br>10.4201, 106.9595 | Pier                                                  | 10        | 6.62 ± 2.31         |
| Cape of<br>Dong Tranh                                                | CT7 | 10.3777, 106.8782                      | Pier                                                  | 15        | 7.67 ± 1.61         |
| 30 April Beach                                                       | CT8 | 10.3858, 106.9240                      | At the<br>beach                                       | 15        | 10.46 ± 0.95        |
| <b>Can Gio Mangrove – Buffer Zone</b>                                |     |                                        |                                                       | <b>45</b> | <b>10.75 ± 3.01</b> |
| Rach Don Bridge<br>(Long Tau River)                                  | CB1 | 10.5668, 106.8266<br>10.5664, 106.8360 | Bridge<br>Boat                                        | 10        | 15.77 ± 3.93        |
| Loi Giang Bridge (Long<br>Tau River)                                 | CB2 | 10.5441, 106.8318<br>10.5433, 106.8460 | Bridge<br>Boat                                        | 10        | 8.62 ± 3.30         |
| Long Giang Xay 2<br>Bridge                                           | CB3 | 10.5082, 106.8647                      | Bridge                                                | 10        | 10.36 ± 7.61        |
| Dan Xay Bridge                                                       | CB4 | 10.5077, 106.8638                      | Bridge                                                | 10        | 8.95 ± 4.68         |
| Dúra River<br>(Tac Roi Canal)                                        | CB5 | 10.5755, 106.8857                      | Boat                                                  | 5         | 10.80 ± 1.54        |
| <b>Can Gio Mangrove – Core Zone</b>                                  |     |                                        |                                                       | <b>35</b> | <b>7.84 ± 1.28</b>  |
| Can Gio Protection<br>Forest Management<br>Board<br>(Can Gio C1, C2) | CC1 | 10.5060, 106.8686<br>10.5222, 106.8715 | Land<br>Boat                                          | 10        | 6.93 ± 1.08         |
|                                                                      | CC2 | 10.5421, 106.8323                      |                                                       | 10        | 10.09 ± 2.84        |
| Long Tau River<br>(Can Gio C3)                                       | CC3 | 10.5315, 106.9175                      | Boat                                                  | 15        | 7.43 ± 2.52         |
| <b>End of Can Gio, go to the East Sea (seawater)</b>                 |     |                                        |                                                       |           |                     |
| Downstream of Long<br>Tau River                                      | ES1 | 10.4687, 106.9447                      | Boat                                                  | 20        | 7.39 ± 5.75         |
| Downstream of Soai Rap<br>River                                      | ES2 | 10.2770, 106.8420                      | Big<br>canoe                                          | 20        | 3.49 ± 1.18         |
| Ganh Rai Gulf                                                        | ES3 | 10.2492, 107.0059<br>10.2170, 107.0200 |                                                       | 45        | 3.01 ± 1.65         |
| White Tiger<br>oil field                                             | ES4 | 10.2630, 108.2253                      | In the sea<br>with the<br>help of<br>fishing<br>boats | 25        | 4.72 ± 1.25         |

*Table S2. Turkey's multiple comparison tests for Saigon urban canals***Multiple Comparisons**

Dependent Variable: MPs

Tukey HSD

| (I) Positon            | (J) Positon            | Mean Difference<br>(I-J) | Std. Error | Sig.  |
|------------------------|------------------------|--------------------------|------------|-------|
| Bridge No 1            | Tran Quang Dieu Bridge | 9.83333                  | 21.00805   | 1.000 |
|                        | Nhieu Loc              | 18.33333                 | 21.00805   | 1.000 |
|                        | Hoang Hoa Tham Bridge  | 19.16667                 | 23.01317   | 1.000 |
|                        | Bui Huu Nghia Bridge   | -12.41667                | 21.00805   | 1.000 |
|                        | Thi Nghe               | 12.08333                 | 21.00805   | 1.000 |
|                        | Bach ?ang Wharf        | 24.75000                 | 16.27277   | .969  |
|                        | Lo Gom Canal           | -7.91667                 | 21.00805   | 1.000 |
|                        | Cha Va Bridge          | 1.00000                  | 18.79017   | 1.000 |
|                        | Letter Y Bridge        | -5.83333                 | 18.79017   | 1.000 |
|                        | Nguyen Van Cu Bridge   | 9.37879                  | 16.51749   | 1.000 |
|                        | Kenh Te Bridge         | -12.66667                | 17.57660   | 1.000 |
|                        | Tan Thuan II Bridge    | 18.53333                 | 16.80644   | .999  |
|                        | Mong Bridge            | 12.45833                 | 17.57660   | 1.000 |
|                        | Khanh Hoi Bridge       | 18.83333                 | 23.01317   | 1.000 |
|                        | Bridge No 1            | -9.83333                 | 21.00805   | 1.000 |
| Tran Quang Dieu Bridge | Nhieu Loc              | 8.50000                  | 23.01317   | 1.000 |
|                        | Hoang Hoa Tham Bridge  | 9.33333                  | 24.85706   | 1.000 |
|                        | Bui Huu Nghia Bridge   | -22.25000                | 23.01317   | 1.000 |
|                        | Thi Nghe               | 2.25000                  | 23.01317   | 1.000 |
|                        | Bach ?ang Wharf        | 14.91667                 | 18.79017   | 1.000 |

|           |                        |           |          |       |
|-----------|------------------------|-----------|----------|-------|
| Nhieu Loc | Lo Gom Canal           | -17.75000 | 23.01317 | 1.000 |
|           | Cha Va Bridge          | -8.83333  | 21.00805 | 1.000 |
|           | Letter Y Bridge        | -15.66667 | 21.00805 | 1.000 |
|           | Nguyen Van Cu Bridge   | -.45455   | 19.00250 | 1.000 |
|           | Kenh Te Bridge         | -22.50000 | 19.92999 | .998  |
|           | Tan Thuan II Bridge    | 8.70000   | 19.25420 | 1.000 |
|           | Mong Bridge            | 2.62500   | 19.92999 | 1.000 |
|           | Khanh Hoi Bridge       | 9.00000   | 24.85706 | 1.000 |
|           | Bridge No 1            | -18.33333 | 21.00805 | 1.000 |
|           | Tran Quang Dieu Bridge | -8.50000  | 23.01317 | 1.000 |

### Multiple Comparisons

Dependent Variable: MPs

Tukey HSD

| (I) Positon | (J) Positon            | 95% Confidence Interval |             |
|-------------|------------------------|-------------------------|-------------|
|             |                        | Lower Bound             | Upper Bound |
| Bridge No 1 | Tran Quang Dieu Bridge | -63.7476                | 83.4143     |
|             | Nhieu Loc              | -55.2476                | 91.9143     |
|             | Hoang Hoa Tham Bridge  | -61.4373                | 99.7706     |
|             | Bui Huu Nghia Bridge   | -85.9976                | 61.1643     |
|             | Thi Nghe               | -61.4976                | 85.6643     |
|             | Bach ?ang Wharf        | -32.2456                | 81.7456     |
|             | Lo Gom Canal           | -81.4976                | 65.6643     |
|             | Cha Va Bridge          | -64.8128                | 66.8128     |
|             | Letter Y Bridge        | -71.6462                | 59.9795     |
|             | Nguyen Van Cu Bridge   | -48.4739                | 67.2315     |

|                        |                        |           |         |
|------------------------|------------------------|-----------|---------|
| Tran Quang Dieu Bridge | Kenh Te Bridge         | -74.2289  | 48.8956 |
|                        | Tan Thuan II Bridge    | -40.3315  | 77.3981 |
|                        | Mong Bridge            | -49.1039  | 74.0206 |
|                        | Khanh Hoi Bridge       | -61.7706  | 99.4373 |
|                        | Bridge No 1            | -83.4143  | 63.7476 |
|                        | Nhieu Loc              | -72.1039  | 89.1039 |
|                        | Hoang Hoa Tham Bridge  | -77.7289  | 96.3955 |
|                        | Bui Huu Nghia Bridge   | -102.8539 | 58.3539 |
|                        | Thi Nghe               | -78.3539  | 82.8539 |
|                        | Bach ?ang Wharf        | -50.8962  | 80.7295 |
|                        | Lo Gom Canal           | -98.3539  | 62.8539 |
|                        | Cha Va Bridge          | -82.4143  | 64.7476 |
|                        | Letter Y Bridge        | -89.2476  | 57.9143 |
|                        | Nguyen Van Cu Bridge   | -67.0110  | 66.1020 |
|                        | Kenh Te Bridge         | -92.3050  | 47.3050 |
| Nhieu Loc              | Tan Thuan II Bridge    | -58.7381  | 76.1381 |
|                        | Mong Bridge            | -67.1800  | 72.4300 |
|                        | Khanh Hoi Bridge       | -78.0622  | 96.0622 |
|                        | Bridge No 1            | -91.9143  | 55.2476 |
|                        | Tran Quang Dieu Bridge | -89.1039  | 72.1039 |

### Multiple Comparisons

Dependent Variable: MPs

Tukey HSD

| (I) Positon | (J) Positon | Mean Difference<br>(I-J) | Std. Error | Sig. |
|-------------|-------------|--------------------------|------------|------|
|             |             |                          |            |      |

|                       |                        |           |          |       |
|-----------------------|------------------------|-----------|----------|-------|
| Nhieu Loc             | Hoang Hoa Tham Bridge  | .83333    | 24.85706 | 1.000 |
|                       | Bui Huu Nghia Bridge   | -30.75000 | 23.01317 | .990  |
|                       | Thi Nghe               | -6.25000  | 23.01317 | 1.000 |
|                       | Bach ?ang Wharf        | 6.41667   | 18.79017 | 1.000 |
|                       | Lo Gom Canal           | -26.25000 | 23.01317 | .998  |
|                       | Cha Va Bridge          | -17.33333 | 21.00805 | 1.000 |
|                       | Letter Y Bridge        | -24.16667 | 21.00805 | .998  |
|                       | Nguyen Van Cu Bridge   | -8.95455  | 19.00250 | 1.000 |
|                       | Kenh Te Bridge         | -31.00000 | 19.92999 | .963  |
|                       | Tan Thuan II Bridge    | .20000    | 19.25420 | 1.000 |
|                       | Mong Bridge            | -5.87500  | 19.92999 | 1.000 |
|                       | Khanh Hoi Bridge       | .50000    | 24.85706 | 1.000 |
|                       | Bridge No 1            | -19.16667 | 23.01317 | 1.000 |
|                       | Tran Quang Dieu Bridge | -9.33333  | 24.85706 | 1.000 |
|                       | Nhieu Loc              | -.83333   | 24.85706 | 1.000 |
|                       | Bui Huu Nghia Bridge   | -31.58333 | 24.85706 | .994  |
|                       | Thi Nghe               | -7.08333  | 24.85706 | 1.000 |
|                       | Bach ?ang Wharf        | 5.58333   | 21.00805 | 1.000 |
|                       | Lo Gom Canal           | -27.08333 | 24.85706 | .999  |
| Hoang Hoa Tham Bridge | Cha Va Bridge          | -18.16667 | 23.01317 | 1.000 |
|                       | Letter Y Bridge        | -25.00000 | 23.01317 | .999  |
|                       | Nguyen Van Cu Bridge   | -9.78788  | 21.19818 | 1.000 |
|                       | Kenh Te Bridge         | -31.83333 | 22.03343 | .980  |
|                       | Tan Thuan II Bridge    | -.63333   | 21.42410 | 1.000 |
|                       | Mong Bridge            | -6.70833  | 22.03343 | 1.000 |
|                       | Khanh Hoi Bridge       | -.33333   | 26.57332 | 1.000 |

|                      |                        |          |          |       |
|----------------------|------------------------|----------|----------|-------|
| Bui Huu Nghia Bridge | Bridge No 1            | 12.41667 | 21.00805 | 1.000 |
|                      | Tran Quang Dieu Bridge | 22.25000 | 23.01317 | 1.000 |
|                      | Nhieu Loc              | 30.75000 | 23.01317 | .990  |
|                      | Hoang Hoa Tham Bridge  | 31.58333 | 24.85706 | .994  |

**Multiple Comparisons**

Dependent Variable: MPs

Tukey HSD

| (I) Positon           | (J) Positon            | 95% Confidence Interval |             |
|-----------------------|------------------------|-------------------------|-------------|
|                       |                        | Lower Bound             | Upper Bound |
| Nhieu Loc             | Hoang Hoa Tham Bridge  | -86.2289                | 87.8955     |
|                       | Bui Huu Nghia Bridge   | -111.3539               | 49.8539     |
|                       | Thi Nghe               | -86.8539                | 74.3539     |
|                       | Bach ?ang Wharf        | -59.3962                | 72.2295     |
|                       | Lo Gom Canal           | -106.8539               | 54.3539     |
|                       | Cha Va Bridge          | -90.9143                | 56.2476     |
|                       | Letter Y Bridge        | -97.7476                | 49.4143     |
|                       | Nguyen Van Cu Bridge   | -75.5110                | 57.6020     |
|                       | Kenh Te Bridge         | -100.8050               | 38.8050     |
|                       | Tan Thuan II Bridge    | -67.2381                | 67.6381     |
|                       | Mong Bridge            | -75.6800                | 63.9300     |
|                       | Khanh Hoi Bridge       | -86.5622                | 87.5622     |
|                       | Bridge No 1            | -99.7706                | 61.4373     |
| Hoang Hoa Tham Bridge | Tran Quang Dieu Bridge | -96.3955                | 77.7289     |
|                       | Nhieu Loc              | -87.8955                | 86.2289     |

|                      |                        |           |          |
|----------------------|------------------------|-----------|----------|
| Bui Huu Nghia Bridge | Bui Huu Nghia Bridge   | -118.6455 | 55.4789  |
|                      | Thi Nghe               | -94.1455  | 79.9789  |
|                      | Bach ?ang Wharf        | -67.9976  | 79.1643  |
|                      | Lo Gom Canal           | -114.1455 | 59.9789  |
|                      | Cha Va Bridge          | -98.7706  | 62.4373  |
|                      | Letter Y Bridge        | -105.6039 | 55.6039  |
|                      | Nguyen Van Cu Bridge   | -84.0348  | 64.4590  |
|                      | Kenh Te Bridge         | -109.0057 | 45.3391  |
|                      | Tan Thuan II Bridge    | -75.6715  | 74.4048  |
|                      | Mong Bridge            | -83.8807  | 70.4641  |
|                      | Khanh Hoi Bridge       | -93.4067  | 92.7401  |
|                      | Bridge No 1            | -61.1643  | 85.9976  |
|                      | Tran Quang Dieu Bridge | -58.3539  | 102.8539 |
|                      | Nhieu Loc              | -49.8539  | 111.3539 |
|                      | Hoang Hoa Tham Bridge  | -55.4789  | 118.6455 |

### Multiple Comparisons

Dependent Variable: MPs

Tukey HSD

| (I) Positon          | (J) Positon     | Mean Difference<br>(I-J) | Std. Error | Sig.  |
|----------------------|-----------------|--------------------------|------------|-------|
| Bui Huu Nghia Bridge | Thi Nghe        | 24.50000                 | 23.01317   | .999  |
|                      | Bach ?ang Wharf | 37.16667                 | 18.79017   | .805  |
|                      | Lo Gom Canal    | 4.50000                  | 23.01317   | 1.000 |
|                      | Cha Va Bridge   | 13.41667                 | 21.00805   | 1.000 |
|                      | Letter Y Bridge | 6.58333                  | 21.00805   | 1.000 |



|                 |                        |           |          |       |
|-----------------|------------------------|-----------|----------|-------|
| Thi Nghe        | Nguyen Van Cu Bridge   | 21.79545  | 19.00250 | .998  |
|                 | Kenh Te Bridge         | -.25000   | 19.92999 | 1.000 |
|                 | Tan Thuan II Bridge    | 30.95000  | 19.25420 | .952  |
|                 | Mong Bridge            | 24.87500  | 19.92999 | .995  |
|                 | Khanh Hoi Bridge       | 31.25000  | 24.85706 | .995  |
|                 | Bridge No 1            | -12.08333 | 21.00805 | 1.000 |
|                 | Tran Quang Dieu Bridge | -2.25000  | 23.01317 | 1.000 |
|                 | Nhieu Loc              | 6.25000   | 23.01317 | 1.000 |
|                 | Hoang Hoa Tham Bridge  | 7.08333   | 24.85706 | 1.000 |
|                 | Bui Huu Nghia Bridge   | -24.50000 | 23.01317 | .999  |
|                 | Bach ?ang Wharf        | 12.66667  | 18.79017 | 1.000 |
|                 | Lo Gom Canal           | -20.00000 | 23.01317 | 1.000 |
|                 | Cha Va Bridge          | -11.08333 | 21.00805 | 1.000 |
|                 | Letter Y Bridge        | -17.91667 | 21.00805 | 1.000 |
|                 | Nguyen Van Cu Bridge   | -2.70455  | 19.00250 | 1.000 |
| Bach ?ang Wharf | Kenh Te Bridge         | -24.75000 | 19.92999 | .995  |
|                 | Tan Thuan II Bridge    | 6.45000   | 19.25420 | 1.000 |
|                 | Mong Bridge            | .37500    | 19.92999 | 1.000 |
|                 | Khanh Hoi Bridge       | 6.75000   | 24.85706 | 1.000 |
|                 | Bridge No 1            | -24.75000 | 16.27277 | .969  |
|                 | Tran Quang Dieu Bridge | -14.91667 | 18.79017 | 1.000 |
|                 | Nhieu Loc              | -6.41667  | 18.79017 | 1.000 |
|                 | Hoang Hoa Tham Bridge  | -5.58333  | 21.00805 | 1.000 |
|                 | Bui Huu Nghia Bridge   | -37.16667 | 18.79017 | .805  |
|                 | Thi Nghe               | -12.66667 | 18.79017 | 1.000 |

**Multiple Comparisons**

Dependent Variable: MPs

Tukey HSD

| (I) Positon          | (J) Positon            | 95% Confidence Interval |             |
|----------------------|------------------------|-------------------------|-------------|
|                      |                        | Lower Bound             | Upper Bound |
| Bui Huu Nghia Bridge | Thi Nghe               | -56.1039                | 105.1039    |
|                      | Bach ?ang Wharf        | -28.6462                | 102.9795    |
|                      | Lo Gom Canal           | -76.1039                | 85.1039     |
|                      | Cha Va Bridge          | -60.1643                | 86.9976     |
|                      | Letter Y Bridge        | -66.9976                | 80.1643     |
|                      | Nguyen Van Cu Bridge   | -44.7610                | 88.3520     |
|                      | Kenh Te Bridge         | -70.0550                | 69.5550     |
|                      | Tan Thuan II Bridge    | -36.4881                | 98.3881     |
|                      | Mong Bridge            | -44.9300                | 94.6800     |
|                      | Khanh Hoi Bridge       | -55.8122                | 118.3122    |
|                      | Bridge No 1            | -85.6643                | 61.4976     |
|                      | Tran Quang Dieu Bridge | -82.8539                | 78.3539     |
|                      | Nhieu Loc              | -74.3539                | 86.8539     |
|                      | Hoang Hoa Tham Bridge  | -79.9789                | 94.1455     |
|                      | Bui Huu Nghia Bridge   | -105.1039               | 56.1039     |
| Thi Nghe             | Bach ?ang Wharf        | -53.1462                | 78.4795     |
|                      | Lo Gom Canal           | -100.6039               | 60.6039     |
|                      | Cha Va Bridge          | -84.6643                | 62.4976     |
|                      | Letter Y Bridge        | -91.4976                | 55.6643     |
|                      | Nguyen Van Cu Bridge   | -69.2610                | 63.8520     |
|                      | Kenh Te Bridge         | -94.5550                | 45.0550     |

|                 |                        |           |         |
|-----------------|------------------------|-----------|---------|
| Bach ?ang Wharf | Tan Thuan II Bridge    | -60.9881  | 73.8881 |
|                 | Mong Bridge            | -69.4300  | 70.1800 |
|                 | Khanh Hoi Bridge       | -80.3122  | 93.8122 |
|                 | Bridge No 1            | -81.7456  | 32.2456 |
|                 | Tran Quang Dieu Bridge | -80.7295  | 50.8962 |
|                 | Nhieu Loc              | -72.2295  | 59.3962 |
|                 | Hoang Hoa Tham Bridge  | -79.1643  | 67.9976 |
|                 | Bui Huu Nghia Bridge   | -102.9795 | 28.6462 |
|                 | Thi Nghe               | -78.4795  | 53.1462 |

### Multiple Comparisons

Dependent Variable: MPs

Tukey HSD

| (I) Positon     | (J) Positon            | Mean Difference<br>(I-J) | Std. Error | Sig.  |
|-----------------|------------------------|--------------------------|------------|-------|
| Bach ?ang Wharf | Lo Gom Canal           | -32.66667                | 18.79017   | .914  |
|                 | Cha Va Bridge          | -23.75000                | 16.27277   | .978  |
|                 | Letter Y Bridge        | -30.58333                | 16.27277   | .856  |
|                 | Nguyen Van Cu Bridge   | -15.37121                | 13.58527   | .998  |
|                 | Kenh Te Bridge         | -37.41667                | 14.85494   | .440  |
|                 | Tan Thuan II Bridge    | -6.21667                 | 13.93517   | 1.000 |
|                 | Mong Bridge            | -12.29167                | 14.85494   | 1.000 |
|                 | Khanh Hoi Bridge       | -5.91667                 | 21.00805   | 1.000 |
|                 | Bridge No 1            | 7.91667                  | 21.00805   | 1.000 |
| Lo Gom Canal    | Tran Quang Dieu Bridge | 17.75000                 | 23.01317   | 1.000 |
|                 | Nhieu Loc              | 26.25000                 | 23.01317   | .998  |

|               |                        |           |          |       |
|---------------|------------------------|-----------|----------|-------|
| Cha Va Bridge | Hoang Hoa Tham Bridge  | 27.08333  | 24.85706 | .999  |
|               | Bui Huu Nghia Bridge   | -4.50000  | 23.01317 | 1.000 |
|               | Thi Nghe               | 20.00000  | 23.01317 | 1.000 |
|               | Bach ?ang Wharf        | 32.66667  | 18.79017 | .914  |
|               | Cha Va Bridge          | 8.91667   | 21.00805 | 1.000 |
|               | Letter Y Bridge        | 2.08333   | 21.00805 | 1.000 |
|               | Nguyen Van Cu Bridge   | 17.29545  | 19.00250 | 1.000 |
|               | Kenh Te Bridge         | -4.75000  | 19.92999 | 1.000 |
|               | Tan Thuan II Bridge    | 26.45000  | 19.25420 | .987  |
|               | Mong Bridge            | 20.37500  | 19.92999 | .999  |
|               | Khanh Hoi Bridge       | 26.75000  | 24.85706 | .999  |
|               | Bridge No 1            | -1.00000  | 18.79017 | 1.000 |
|               | Tran Quang Dieu Bridge | 8.83333   | 21.00805 | 1.000 |
|               | Nhieu Loc              | 17.33333  | 21.00805 | 1.000 |
|               | Hoang Hoa Tham Bridge  | 18.16667  | 23.01317 | 1.000 |
|               | Bui Huu Nghia Bridge   | -13.41667 | 21.00805 | 1.000 |
|               | Thi Nghe               | 11.08333  | 21.00805 | 1.000 |
|               | Bach ?ang Wharf        | 23.75000  | 16.27277 | .978  |
|               | Lo Gom Canal           | -8.91667  | 21.00805 | 1.000 |

### Multiple Comparisons

Dependent Variable: MPs

Tukey HSD

| (I) Positon     | (J) Positon  | 95% Confidence Interval |             |
|-----------------|--------------|-------------------------|-------------|
|                 |              | Lower Bound             | Upper Bound |
| Bach ?ang Wharf | Lo Gom Canal | -98.4795                | 33.1462     |

|               |                        |          |          |
|---------------|------------------------|----------|----------|
| Lo Gom Canal  | Cha Va Bridge          | -80.7456 | 33.2456  |
|               | Letter Y Bridge        | -87.5789 | 26.4123  |
|               | Nguyen Van Cu Bridge   | -62.9538 | 32.2114  |
|               | Kenh Te Bridge         | -89.4463 | 14.6129  |
|               | Tan Thuan II Bridge    | -55.0248 | 42.5914  |
|               | Mong Bridge            | -64.3213 | 39.7379  |
|               | Khanh Hoi Bridge       | -79.4976 | 67.6643  |
|               | Bridge No 1            | -65.6643 | 81.4976  |
|               | Tran Quang Dieu Bridge | -62.8539 | 98.3539  |
|               | Nhieu Loc              | -54.3539 | 106.8539 |
|               | Hoang Hoa Tham Bridge  | -59.9789 | 114.1455 |
|               | Bui Huu Nghia Bridge   | -85.1039 | 76.1039  |
|               | Thi Nghe               | -60.6039 | 100.6039 |
|               | Bach ?ang Wharf        | -33.1462 | 98.4795  |
|               | Cha Va Bridge          | -64.6643 | 82.4976  |
| Cha Va Bridge | Letter Y Bridge        | -71.4976 | 75.6643  |
|               | Nguyen Van Cu Bridge   | -49.2610 | 83.8520  |
|               | Kenh Te Bridge         | -74.5550 | 65.0550  |
|               | Tan Thuan II Bridge    | -40.9881 | 93.8881  |
|               | Mong Bridge            | -49.4300 | 90.1800  |
|               | Khanh Hoi Bridge       | -60.3122 | 113.8122 |
|               | Bridge No 1            | -66.8128 | 64.8128  |
|               | Tran Quang Dieu Bridge | -64.7476 | 82.4143  |
|               | Nhieu Loc              | -56.2476 | 90.9143  |
|               | Hoang Hoa Tham Bridge  | -62.4373 | 98.7706  |
|               | Bui Huu Nghia Bridge   | -86.9976 | 60.1643  |

|                 |          |         |
|-----------------|----------|---------|
| Thi Nghe        | -62.4976 | 84.6643 |
| Bach ?ang Wharf | -33.2456 | 80.7456 |
| Lo Gom Canal    | -82.4976 | 64.6643 |

**Multiple Comparisons**

Dependent Variable: MPs

Tukey HSD

| (I) Positon     | (J) Positon            | Mean Difference<br>(I-J) | Std. Error | Sig.  |
|-----------------|------------------------|--------------------------|------------|-------|
| Cha Va Bridge   | Letter Y Bridge        | -6.83333                 | 18.79017   | 1.000 |
|                 | Nguyen Van Cu Bridge   | 8.37879                  | 16.51749   | 1.000 |
|                 | Kenh Te Bridge         | -13.66667                | 17.57660   | 1.000 |
|                 | Tan Thuan II Bridge    | 17.53333                 | 16.80644   | .999  |
|                 | Mong Bridge            | 11.45833                 | 17.57660   | 1.000 |
|                 | Khanh Hoi Bridge       | 17.83333                 | 23.01317   | 1.000 |
|                 | Bridge No 1            | 5.83333                  | 18.79017   | 1.000 |
|                 | Tran Quang Dieu Bridge | 15.66667                 | 21.00805   | 1.000 |
|                 | Nhieu Loc              | 24.16667                 | 21.00805   | .998  |
|                 | Hoang Hoa Tham Bridge  | 25.00000                 | 23.01317   | .999  |
|                 | Bui Huu Nghia Bridge   | -6.58333                 | 21.00805   | 1.000 |
|                 | Thi Nghe               | 17.91667                 | 21.00805   | 1.000 |
| Letter Y Bridge | Bach ?ang Wharf        | 30.58333                 | 16.27277   | .856  |
|                 | Lo Gom Canal           | -2.08333                 | 21.00805   | 1.000 |
|                 | Cha Va Bridge          | 6.83333                  | 18.79017   | 1.000 |
|                 | Nguyen Van Cu Bridge   | 15.21212                 | 16.51749   | 1.000 |
|                 | Kenh Te Bridge         | -6.83333                 | 17.57660   | 1.000 |

|                      |                        |           |          |       |
|----------------------|------------------------|-----------|----------|-------|
| Nguyen Van Cu Bridge | Tan Thuan II Bridge    | 24.36667  | 16.80644 | .980  |
|                      | Mong Bridge            | 18.29167  | 17.57660 | .999  |
|                      | Khanh Hoi Bridge       | 24.66667  | 23.01317 | .999  |
|                      | Bridge No 1            | -9.37879  | 16.51749 | 1.000 |
|                      | Tran Quang Dieu Bridge | .45455    | 19.00250 | 1.000 |
|                      | Nhieu Loc              | 8.95455   | 19.00250 | 1.000 |
|                      | Hoang Hoa Tham Bridge  | 9.78788   | 21.19818 | 1.000 |
|                      | Bui Huu Nghia Bridge   | -21.79545 | 19.00250 | .998  |
|                      | Thi Nghe               | 2.70455   | 19.00250 | 1.000 |
|                      | Bach ?ang Wharf        | 15.37121  | 13.58527 | .998  |
|                      | Lo Gom Canal           | -17.29545 | 19.00250 | 1.000 |
|                      | Cha Va Bridge          | -8.37879  | 16.51749 | 1.000 |
|                      | Letter Y Bridge        | -15.21212 | 16.51749 | 1.000 |

### Multiple Comparisons

Dependent Variable: MPs

Tukey HSD

| (I) Positon     | (J) Positon          | 95% Confidence Interval |             |
|-----------------|----------------------|-------------------------|-------------|
|                 |                      | Lower Bound             | Upper Bound |
| Cha Va Bridge   | Letter Y Bridge      | -72.6462                | 58.9795     |
|                 | Nguyen Van Cu Bridge | -49.4739                | 66.2315     |
|                 | Kenh Te Bridge       | -75.2289                | 47.8956     |
|                 | Tan Thuan II Bridge  | -41.3315                | 76.3981     |
|                 | Mong Bridge          | -50.1039                | 73.0206     |
|                 | Khanh Hoi Bridge     | -62.7706                | 98.4373     |
| Letter Y Bridge | Bridge No 1          | -59.9795                | 71.6462     |

|                      |                        |          |          |
|----------------------|------------------------|----------|----------|
| Nguyen Van Cu Bridge | Tran Quang Dieu Bridge | -57.9143 | 89.2476  |
|                      | Nhieu Loc              | -49.4143 | 97.7476  |
|                      | Hoang Hoa Tham Bridge  | -55.6039 | 105.6039 |
|                      | Bui Huu Nghia Bridge   | -80.1643 | 66.9976  |
|                      | Thi Nghe               | -55.6643 | 91.4976  |
|                      | Bach ?ang Wharf        | -26.4123 | 87.5789  |
|                      | Lo Gom Canal           | -75.6643 | 71.4976  |
|                      | Cha Va Bridge          | -58.9795 | 72.6462  |
|                      | Nguyen Van Cu Bridge   | -42.6406 | 73.0648  |
|                      | Kenh Te Bridge         | -68.3956 | 54.7289  |
|                      | Tan Thuan II Bridge    | -34.4981 | 83.2315  |
|                      | Mong Bridge            | -43.2706 | 79.8539  |
|                      | Khanh Hoi Bridge       | -55.9373 | 105.2706 |
|                      | Bridge No 1            | -67.2315 | 48.4739  |
|                      | Tran Quang Dieu Bridge | -66.1020 | 67.0110  |
|                      | Nhieu Loc              | -57.6020 | 75.5110  |
|                      | Hoang Hoa Tham Bridge  | -64.4590 | 84.0348  |
|                      | Bui Huu Nghia Bridge   | -88.3520 | 44.7610  |
|                      | Thi Nghe               | -63.8520 | 69.2610  |
|                      | Bach ?ang Wharf        | -32.2114 | 62.9538  |
|                      | Lo Gom Canal           | -83.8520 | 49.2610  |
|                      | Cha Va Bridge          | -66.2315 | 49.4739  |
|                      | Letter Y Bridge        | -73.0648 | 42.6406  |

### Multiple Comparisons

Dependent Variable: MPs

Tukey HSD



| (I) Positon          | (J) Positon            | Mean Difference<br>(I-J) | Std. Error | Sig.  |
|----------------------|------------------------|--------------------------|------------|-------|
| Nguyen Van Cu Bridge | Kenh Te Bridge         | -22.04545                | 15.12262   | .979  |
|                      | Tan Thuan II Bridge    | 9.15455                  | 14.22017   | 1.000 |
|                      | Mong Bridge            | 3.07955                  | 15.12262   | 1.000 |
|                      | Khanh Hoi Bridge       | 9.45455                  | 21.19818   | 1.000 |
|                      | Bridge No 1            | 12.66667                 | 17.57660   | 1.000 |
|                      | Tran Quang Dieu Bridge | 22.50000                 | 19.92999   | .998  |
|                      | Nhieu Loc              | 31.00000                 | 19.92999   | .963  |
|                      | Hoang Hoa Tham Bridge  | 31.83333                 | 22.03343   | .980  |
|                      | Bui Huu Nghia Bridge   | .25000                   | 19.92999   | 1.000 |
|                      | Thi Nghe               | 24.75000                 | 19.92999   | .995  |
|                      | Bach ?ang Wharf        | 37.41667                 | 14.85494   | .440  |
| Kenh Te Bridge       | Lo Gom Canal           | 4.75000                  | 19.92999   | 1.000 |
|                      | Cha Va Bridge          | 13.66667                 | 17.57660   | 1.000 |
|                      | Letter Y Bridge        | 6.83333                  | 17.57660   | 1.000 |
|                      | Nguyen Van Cu Bridge   | 22.04545                 | 15.12262   | .979  |
|                      | Tan Thuan II Bridge    | 31.20000                 | 15.43770   | .780  |
| Tan Thuan II Bridge  | Mong Bridge            | 25.12500                 | 16.27277   | .965  |
|                      | Khanh Hoi Bridge       | 31.50000                 | 22.03343   | .982  |
|                      | Bridge No 1            | -18.53333                | 16.80644   | .999  |
|                      | Tran Quang Dieu Bridge | -8.70000                 | 19.25420   | 1.000 |
|                      | Nhieu Loc              | -.20000                  | 19.25420   | 1.000 |
|                      | Hoang Hoa Tham Bridge  | .63333                   | 21.42410   | 1.000 |
|                      | Bui Huu Nghia Bridge   | -30.95000                | 19.25420   | .952  |
|                      | Thi Nghe               | -6.45000                 | 19.25420   | 1.000 |

|                      |           |          |       |
|----------------------|-----------|----------|-------|
| Bach ?ang Wharf      | 6.21667   | 13.93517 | 1.000 |
| Lo Gom Canal         | -26.45000 | 19.25420 | .987  |
| Cha Va Bridge        | -17.53333 | 16.80644 | .999  |
| Letter Y Bridge      | -24.36667 | 16.80644 | .980  |
| Nguyen Van Cu Bridge | -9.15455  | 14.22017 | 1.000 |
| Kenh Te Bridge       | -31.20000 | 15.43770 | .780  |

**Multiple Comparisons**

Dependent Variable: MPs

Tukey HSD

| (I) Positon          | (J) Positon            | 95% Confidence Interval |             |
|----------------------|------------------------|-------------------------|-------------|
|                      |                        | Lower Bound             | Upper Bound |
| Nguyen Van Cu Bridge | Kenh Te Bridge         | -75.0126                | 30.9217     |
|                      | Tan Thuan II Bridge    | -40.6518                | 58.9609     |
|                      | Mong Bridge            | -49.8876                | 56.0467     |
|                      | Khanh Hoi Bridge       | -64.7923                | 83.7014     |
|                      | Bridge No 1            | -48.8956                | 74.2289     |
|                      | Tran Quang Dieu Bridge | -47.3050                | 92.3050     |
|                      | Nhieu Loc              | -38.8050                | 100.8050    |
|                      | Hoang Hoa Tham Bridge  | -45.3391                | 109.0057    |
|                      | Bui Huu Nghia Bridge   | -69.5550                | 70.0550     |
|                      | Thi Nghe               | -45.0550                | 94.5550     |
| Kenh Te Bridge       | Bach ?ang Wharf        | -14.6129                | 89.4463     |
|                      | Lo Gom Canal           | -65.0550                | 74.5550     |
|                      | Cha Va Bridge          | -47.8956                | 75.2289     |
|                      | Letter Y Bridge        | -54.7289                | 68.3956     |

|                     |                        |          |          |
|---------------------|------------------------|----------|----------|
| Tan Thuan II Bridge | Nguyen Van Cu Bridge   | -30.9217 | 75.0126  |
|                     | Tan Thuan II Bridge    | -22.8708 | 85.2708  |
|                     | Mong Bridge            | -31.8706 | 82.1206  |
|                     | Khanh Hoi Bridge       | -45.6724 | 108.6724 |
|                     | Bridge No 1            | -77.3981 | 40.3315  |
|                     | Tran Quang Dieu Bridge | -76.1381 | 58.7381  |
|                     | Nhieu Loc              | -67.6381 | 67.2381  |
|                     | Hoang Hoa Tham Bridge  | -74.4048 | 75.6715  |
|                     | Bui Huu Nghia Bridge   | -98.3881 | 36.4881  |
|                     | Thi Nghe               | -73.8881 | 60.9881  |
|                     | Bach ?ang Wharf        | -42.5914 | 55.0248  |
|                     | Lo Gom Canal           | -93.8881 | 40.9881  |
|                     | Cha Va Bridge          | -76.3981 | 41.3315  |
|                     | Letter Y Bridge        | -83.2315 | 34.4981  |
|                     | Nguyen Van Cu Bridge   | -58.9609 | 40.6518  |
|                     | Kenh Te Bridge         | -85.2708 | 22.8708  |

### Multiple Comparisons

Dependent Variable: MPs

Tukey HSD

| (I) Positon         | (J) Positon            | Mean Difference<br>(I-J) | Std. Error | Sig.  |
|---------------------|------------------------|--------------------------|------------|-------|
| Tan Thuan II Bridge | Mong Bridge            | -6.07500                 | 15.43770   | 1.000 |
|                     | Khanh Hoi Bridge       | .30000                   | 21.42410   | 1.000 |
|                     | Bridge No 1            | -12.45833                | 17.57660   | 1.000 |
|                     | Tran Quang Dieu Bridge | -2.62500                 | 19.92999   | 1.000 |
| Mong Bridge         |                        |                          |            |       |

|                  |                        |           |          |       |
|------------------|------------------------|-----------|----------|-------|
| Khanh Hoi Bridge | Nhieu Loc              | 5.87500   | 19.92999 | 1.000 |
|                  | Hoang Hoa Tham Bridge  | 6.70833   | 22.03343 | 1.000 |
|                  | Bui Huu Nghia Bridge   | -24.87500 | 19.92999 | .995  |
|                  | Thi Nghe               | -.37500   | 19.92999 | 1.000 |
|                  | Bach ?ang Wharf        | 12.29167  | 14.85494 | 1.000 |
|                  | Lo Gom Canal           | -20.37500 | 19.92999 | .999  |
|                  | Cha Va Bridge          | -11.45833 | 17.57660 | 1.000 |
|                  | Letter Y Bridge        | -18.29167 | 17.57660 | .999  |
|                  | Nguyen Van Cu Bridge   | -3.07955  | 15.12262 | 1.000 |
|                  | Kenh Te Bridge         | -25.12500 | 16.27277 | .965  |
|                  | Tan Thuan II Bridge    | 6.07500   | 15.43770 | 1.000 |
|                  | Khanh Hoi Bridge       | 6.37500   | 22.03343 | 1.000 |
|                  | Bridge No 1            | -18.83333 | 23.01317 | 1.000 |
|                  | Tran Quang Dieu Bridge | -9.00000  | 24.85706 | 1.000 |
|                  | Nhieu Loc              | -.50000   | 24.85706 | 1.000 |
|                  | Hoang Hoa Tham Bridge  | .33333    | 26.57332 | 1.000 |
|                  | Bui Huu Nghia Bridge   | -31.25000 | 24.85706 | .995  |
|                  | Thi Nghe               | -6.75000  | 24.85706 | 1.000 |
|                  | Bach ?ang Wharf        | 5.91667   | 21.00805 | 1.000 |
|                  | Lo Gom Canal           | -26.75000 | 24.85706 | .999  |
|                  | Cha Va Bridge          | -17.83333 | 23.01317 | 1.000 |
|                  | Letter Y Bridge        | -24.66667 | 23.01317 | .999  |
|                  | Nguyen Van Cu Bridge   | -9.45455  | 21.19818 | 1.000 |
|                  | Kenh Te Bridge         | -31.50000 | 22.03343 | .982  |
|                  | Tan Thuan II Bridge    | -.30000   | 21.42410 | 1.000 |
|                  | Mong Bridge            | -6.37500  | 22.03343 | 1.000 |

**Multiple Comparisons**

Dependent Variable: MPs

Tukey HSD

| (I) Positon         | (J) Positon            | 95% Confidence Interval |             |
|---------------------|------------------------|-------------------------|-------------|
|                     |                        | Lower Bound             | Upper Bound |
| Tan Thuan II Bridge | Mong Bridge            | -60.1458                | 47.9958     |
|                     | Khanh Hoi Bridge       | -74.7382                | 75.3382     |
|                     | Bridge No 1            | -74.0206                | 49.1039     |
|                     | Tran Quang Dieu Bridge | -72.4300                | 67.1800     |
|                     | Nhieu Loc              | -63.9300                | 75.6800     |
|                     | Hoang Hoa Tham Bridge  | -70.4641                | 83.8807     |
|                     | Bui Huu Nghia Bridge   | -94.6800                | 44.9300     |
|                     | Thi Nghe               | -70.1800                | 69.4300     |
|                     | Bach ?ang Wharf        | -39.7379                | 64.3213     |
| Mong Bridge         | Lo Gom Canal           | -90.1800                | 49.4300     |
|                     | Cha Va Bridge          | -73.0206                | 50.1039     |
|                     | Letter Y Bridge        | -79.8539                | 43.2706     |
|                     | Nguyen Van Cu Bridge   | -56.0467                | 49.8876     |
|                     | Kenh Te Bridge         | -82.1206                | 31.8706     |
|                     | Tan Thuan II Bridge    | -47.9958                | 60.1458     |
|                     | Khanh Hoi Bridge       | -70.7974                | 83.5474     |
|                     | Bridge No 1            | -99.4373                | 61.7706     |
|                     | Tran Quang Dieu Bridge | -96.0622                | 78.0622     |
| Khanh Hoi Bridge    | Nhieu Loc              | -87.5622                | 86.5622     |
|                     | Hoang Hoa Tham Bridge  | -92.7401                | 93.4067     |
|                     | Bui Huu Nghia Bridge   | -118.3122               | 55.8122     |

|                      |           |         |
|----------------------|-----------|---------|
| Thi Nghe             | -93.8122  | 80.3122 |
| Bach ?ang Wharf      | -67.6643  | 79.4976 |
| Lo Gom Canal         | -113.8122 | 60.3122 |
| Cha Va Bridge        | -98.4373  | 62.7706 |
| Letter Y Bridge      | -105.2706 | 55.9373 |
| Nguyen Van Cu Bridge | -83.7014  | 64.7923 |
| Kenh Te Bridge       | -108.6724 | 45.6724 |
| Tan Thuan II Bridge  | -75.3382  | 74.7382 |
| Mong Bridge          | -83.5474  | 70.7974 |

*Table S3. Turkey's multiple comparison tests for Can Gio and East Sea***Multiple Comparisons**

Dependent Variable: MPs

Tukey HSD

| (I) Positon | (J) Positon                  | Mean Difference<br>(I-J) | Std. Error | Sig.  |
|-------------|------------------------------|--------------------------|------------|-------|
| Binh Khanh  | Rach La Bridge               | 9.23333                  | 4.17645    | .789  |
|             | An Nghia Bridge              | 7.26364                  | 3.53375    | .874  |
|             | Intersection of Dong Tranh   | 1.77500                  | 3.83631    | 1.000 |
|             | Ly Nhon                      | 2.36154                  | 3.40185    | 1.000 |
|             | Can Thanh Wharf              | 9.27500                  | 3.83631    | .647  |
|             | Dong Tranh Cape              | 8.23333                  | 4.17645    | .909  |
|             | 30 April Beach               | 5.43846                  | 3.40185    | .988  |
|             | Rach ?on Bridge              | .13077                   | 3.40185    | 1.000 |
|             | Loi Giang Bridge             | 7.43846                  | 3.40185    | .804  |
|             | Long Giang Xay 2 Bridge      | 5.15000                  | 4.78472    | 1.000 |
|             | Dan Xay Bridge               | 7.34444                  | 3.71602    | .907  |
|             | Dua River                    | 5.65000                  | 4.78472    | 1.000 |
|             | Can Gio C1                   | 9.34444                  | 3.71602    | .575  |
|             | Can Gio C2                   | 5.77500                  | 3.83631    | .994  |
|             | Can Gio C3                   | 8.27500                  | 3.83631    | .821  |
|             | Downstream of Long Tau River | 8.56667                  | 4.17645    | .876  |
|             | Downstream of Soai Rap River | 12.12222                 | 3.71602    | .131  |
|             | Ganh Rai Gulf                | 12.82308*                | 3.40185    | .030  |

|                |                            |          |         |       |
|----------------|----------------------------|----------|---------|-------|
| Rach La Bridge | White Tiger Oilfield       | 11.18571 | 3.98564 | .362  |
|                | Binh Khanh                 | -9.23333 | 4.17645 | .789  |
|                | An Nghia Bridge            | -1.96970 | 4.10464 | 1.000 |
|                | Intersection of Dong Tranh | -7.45833 | 4.36783 | .976  |
|                | Ly Nhon                    | -6.87179 | 3.99165 | .974  |
|                | Can Thanh Wharf            | .04167   | 4.36783 | 1.000 |
|                | Dong Tranh Cape            | -1.00000 | 4.66941 | 1.000 |
|                | 30 April Beach             | -3.79487 | 3.99165 | 1.000 |
|                | Rach ?on Bridge            | -9.10256 | 3.99165 | .745  |



**Multiple Comparisons**

Dependent Variable: MPs

Tukey HSD

| (I) Positon                     | (J) Positon                     | Mean Difference<br>(I-J) | Std. Error | Sig.  |
|---------------------------------|---------------------------------|--------------------------|------------|-------|
| Downstream of Soai Rap<br>River | Binh Khanh                      | -12.12222                | 3.71602    | .131  |
|                                 | Rach La Bridge                  | -2.88889                 | 4.26257    | 1.000 |
|                                 | An Nghia Bridge                 | -4.85859                 | 3.63513    | .999  |
|                                 | Intersection of Dong Tranh      | -10.34722                | 3.92989    | .485  |
|                                 | Ly Nhon                         | -9.76068                 | 3.50704    | .378  |
|                                 | Can Thanh Wharf                 | -2.84722                 | 3.92989    | 1.000 |
|                                 | Dong Tranh Cape                 | -3.88889                 | 4.26257    | 1.000 |
|                                 | 30 April Beach                  | -6.68376                 | 3.50704    | .932  |
|                                 | Rach ?on Bridge                 | -11.99145                | 3.50704    | .086  |
|                                 | Loi Giang Bridge                | -4.68376                 | 3.50704    | .999  |
|                                 | Long Giang Xay 2 Bridge         | -6.97222                 | 4.86007    | .997  |
|                                 | Dan Xay Bridge                  | -4.77778                 | 3.81256    | .999  |
|                                 | Dua River                       | -6.47222                 | 4.86007    | .999  |
|                                 | Can Gio C1                      | -2.77778                 | 3.81256    | 1.000 |
|                                 | Can Gio C2                      | -6.34722                 | 3.92989    | .987  |
|                                 | Can Gio C3                      | -3.84722                 | 3.92989    | 1.000 |
|                                 | Downstream of Long Tau<br>River | -3.55556                 | 4.26257    | 1.000 |
|                                 | Ganh Rai Gulf                   | .70085 <sup>*</sup>      | 3.50704    | 1.000 |
|                                 | White Tiger Oilfield            | -.93651                  | 4.07579    | 1.000 |

|               |                            |           |         |       |
|---------------|----------------------------|-----------|---------|-------|
| Ganh Rai Gulf | Binh Khanh                 | -12.82308 | 3.40185 | .030  |
|               | Rach La Bridge             | -3.58974  | 3.99165 | 1.000 |
|               | An Nghia Bridge            | -5.55944  | 3.31329 | .980  |
|               | Intersection of Dong Tranh | -11.04808 | 3.63426 | .224  |
|               | Ly Nhon                    | -10.46154 | 3.17224 | .120  |
|               | Can Thanh Wharf            | -3.54808  | 3.63426 | 1.000 |
|               | Dong Tranh Cape            | -4.58974  | 3.99165 | 1.000 |
|               | 30 April Beach             | -7.38462  | 3.17224 | .712  |
|               | Rach Don Bridge            | -12.69231 | 3.17224 | .014  |

### Multiple Comparisons

Dependent Variable: MPs

Tukey HSD

| (I) Positon     | (J) Positon                  | Mean Difference<br>(I-J) | Std. Error | Sig.  |
|-----------------|------------------------------|--------------------------|------------|-------|
| Rach Don Bridge | Dan Xay Bridge               | 7.21368                  | 3.50704    | .873  |
|                 | Dua River                    | 5.51923                  | 4.62429    | 1.000 |
|                 | Can Gio C1                   | 9.21368                  | 3.50704    | .490  |
|                 | Can Gio C2                   | 5.64423                  | 3.63426    | .991  |
|                 | Can Gio C3                   | 8.14423                  | 3.63426    | .770  |
|                 | Downstream of Long Tau River | 8.43590                  | 3.99165    | .845  |
|                 | Downstream of Soai Rap River | 11.99145                 | 3.50704    | .086  |
|                 | Ganh Rai Gulf                | 12.69231                 | 3.17224    | .014  |
|                 | White Tiger Oilfield         | 11.05495                 | 3.79155    | .293  |

|                  |                              |          |         |       |
|------------------|------------------------------|----------|---------|-------|
| Loi Giang Bridge | Binh Khanh                   | -7.43846 | 3.40185 | .804  |
|                  | Rach La Bridge               | 1.79487  | 3.99165 | 1.000 |
|                  | An Nghia Bridge              | -.17483  | 3.31329 | 1.000 |
|                  | Intersection of Dong Tranh   | -5.66346 | 3.63426 | .991  |
|                  | Ly Nhon                      | -5.07692 | 3.17224 | .988  |
|                  | Can Thanh Wharf              | 1.83654  | 3.63426 | 1.000 |
|                  | Dong Tranh Cape              | .79487   | 3.99165 | 1.000 |
|                  | 30 April Beach               | -2.00000 | 3.17224 | 1.000 |
|                  | Rach ?on Bridge              | -7.30769 | 3.17224 | .729  |
|                  | Long Giang Xay 2 Bridge      | -2.28846 | 4.62429 | 1.000 |
|                  | Dan Xay Bridge               | -.09402  | 3.50704 | 1.000 |
|                  | Dua River                    | -1.78846 | 4.62429 | 1.000 |
|                  | Can Gio C1                   | 1.90598  | 3.50704 | 1.000 |
|                  | Can Gio C2                   | -1.66346 | 3.63426 | 1.000 |
|                  | Can Gio C3                   | .83654   | 3.63426 | 1.000 |
|                  | Downstream of Long Tau River | 1.12821  | 3.99165 | 1.000 |
|                  | Downstream of Soai Rap River | 4.68376  | 3.50704 | .999  |

### Multiple Comparisons

Dependent Variable: MPs

Tukey HSD

| (I) Positon      | (J) Positon          | Mean Difference<br>(I-J) | Std. Error | Sig.  |
|------------------|----------------------|--------------------------|------------|-------|
| Loi Giang Bridge | Ganh Rai Gulf        | 5.38462                  | 3.17224    | .977  |
|                  | White Tiger Oilfield | 3.74725                  | 3.79155    | 1.000 |

|                         |                              |          |         |       |
|-------------------------|------------------------------|----------|---------|-------|
| Long Giang Xay 2 Bridge | Binh Khanh                   | -5.15000 | 4.78472 | 1.000 |
|                         | Rach La Bridge               | 4.08333  | 5.22056 | 1.000 |
|                         | An Nghia Bridge              | 2.11364  | 4.72217 | 1.000 |
|                         | Intersection of Dong Tranh   | -3.37500 | 4.95265 | 1.000 |
|                         | Ly Nhon                      | -2.78846 | 4.62429 | 1.000 |
|                         | Can Thanh Wharf              | 4.12500  | 4.95265 | 1.000 |
|                         | Dong Tranh Cape              | 3.08333  | 5.22056 | 1.000 |
|                         | 30 April Beach               | .28846   | 4.62429 | 1.000 |
|                         | Rach ?on Bridge              | -5.01923 | 4.62429 | 1.000 |
|                         | Loi Giang Bridge             | 2.28846  | 4.62429 | 1.000 |
|                         | Dan Xay Bridge               | 2.19444  | 4.86007 | 1.000 |
|                         | Dua River                    | .50000   | 5.71883 | 1.000 |
|                         | Can Gio C1                   | 4.19444  | 4.86007 | 1.000 |
|                         | Can Gio C2                   | .62500   | 4.95265 | 1.000 |
|                         | Can Gio C3                   | 3.12500  | 4.95265 | 1.000 |
|                         | Downstream of Long Tau River | 3.41667  | 5.22056 | 1.000 |
|                         | Downstream of Soai Rap River | 6.97222  | 4.86007 | .997  |
|                         | Ganh Rai Gulf                | 7.67308  | 4.62429 | .982  |
|                         | White Tiger Oilfield         | 6.03571  | 5.06920 | 1.000 |
|                         | Binh Khanh                   | -7.34444 | 3.71602 | .907  |
| Dan Xay Bridge          | Rach La Bridge               | 1.88889  | 4.26257 | 1.000 |
|                         | An Nghia Bridge              | -.08081  | 3.63513 | 1.000 |
|                         | Intersection of Dong Tranh   | -5.56944 | 3.92989 | .997  |
|                         | Ly Nhon                      | -4.98291 | 3.50704 | .997  |
|                         | Can Thanh Wharf              | 1.93056  | 3.92989 | 1.000 |

**Multiple Comparisons**

Dependent Variable: MPs

Tukey HSD

| (I) Positon    | (J) Positon                  | Mean Difference<br>(I-J) | Std. Error | Sig.  |
|----------------|------------------------------|--------------------------|------------|-------|
| Dan Xay Bridge | Dong Tranh Cape              | .88889                   | 4.26257    | 1.000 |
|                | 30 April Beach               | -1.90598                 | 3.50704    | 1.000 |
|                | Rach ?on Bridge              | -7.21368                 | 3.50704    | .873  |
|                | Loi Giang Bridge             | .09402                   | 3.50704    | 1.000 |
|                | Long Giang Xay 2 Bridge      | -2.19444                 | 4.86007    | 1.000 |
|                | Dua River                    | -1.69444                 | 4.86007    | 1.000 |
|                | Can Gio C1                   | 2.00000                  | 3.81256    | 1.000 |
|                | Can Gio C2                   | -1.56944                 | 3.92989    | 1.000 |
|                | Can Gio C3                   | .93056                   | 3.92989    | 1.000 |
|                | Downstream of Long Tau River | 1.22222                  | 4.26257    | 1.000 |
|                | Downstream of Soai Rap River | 4.77778                  | 3.81256    | .999  |
|                | Ganh Rai Gulf                | 5.47863                  | 3.50704    | .991  |
|                | White Tiger Oilfield         | 3.84127                  | 4.07579    | 1.000 |
|                | Binh Khanh                   | -5.65000                 | 4.78472    | 1.000 |
|                | Rach La Bridge               | 3.58333                  | 5.22056    | 1.000 |
| Dua River      | An Nghia Bridge              | 1.61364                  | 4.72217    | 1.000 |
|                | Intersection of Dong Tranh   | -3.87500                 | 4.95265    | 1.000 |
|                | Ly Nhon                      | -3.28846*                | 4.62429    | 1.000 |

|                         |          |         |       |
|-------------------------|----------|---------|-------|
| Can Thanh Wharf         | 3.62500  | 4.95265 | 1.000 |
| Dong Tranh Cape         | 2.58333  | 5.22056 | 1.000 |
| 30 April Beach          | -.21154  | 4.62429 | 1.000 |
| Rach ?on Bridge         | -5.51923 | 4.62429 | 1.000 |
| Loi Giang Bridge        | 1.78846  | 4.62429 | 1.000 |
| Long Giang Xay 2 Bridge | -.50000  | 5.71883 | 1.000 |
| Dan Xay Bridge          | 1.69444  | 4.86007 | 1.000 |
| Can Gio C1              | 3.69444  | 4.86007 | 1.000 |
| Can Gio C2              | .12500   | 4.95265 | 1.000 |
| Can Gio C3              | 2.62500  | 4.95265 | 1.000 |

### Multiple Comparisons

Dependent Variable: MPs

Tukey HSD

| (I) Positon | (J) Positon                  | Mean Difference<br>(I-J) | Std. Error | Sig.  |
|-------------|------------------------------|--------------------------|------------|-------|
| Dua River   | Downstream of Long Tau River | 2.91667                  | 5.22056    | 1.000 |
|             | Downstream of Soai Rap River | 6.47222                  | 4.86007    | .999  |
|             | Ganh Rai Gulf                | 7.17308                  | 4.62429    | .991  |
|             | White Tiger Oilfield         | 5.53571                  | 5.06920    | 1.000 |
|             | Binh Khanh                   | -9.34444                 | 3.71602    | .575  |
| Can Gio C1  | Rach La Bridge               | -.11111                  | 4.26257    | 1.000 |
|             | An Nghia Bridge              | -2.08081                 | 3.63513    | 1.000 |
|             | Intersection of Dong Tranh   | -7.56944                 | 3.92989    | .925  |

|            |                              |          |         |       |
|------------|------------------------------|----------|---------|-------|
| Can Gio C2 | Ly Nhon                      | -6.98291 | 3.50704 | .901  |
|            | Can Thanh Wharf              | -.06944  | 3.92989 | 1.000 |
|            | Dong Tranh Cape              | -1.11111 | 4.26257 | 1.000 |
|            | 30 April Beach               | -3.90598 | 3.50704 | 1.000 |
|            | Rach ?on Bridge              | -9.21368 | 3.50704 | .490  |
|            | Loi Giang Bridge             | -1.90598 | 3.50704 | 1.000 |
|            | Long Giang Xay 2 Bridge      | -4.19444 | 4.86007 | 1.000 |
|            | Dan Xay Bridge               | -2.00000 | 3.81256 | 1.000 |
|            | Dua River                    | -3.69444 | 4.86007 | 1.000 |
|            | Can Gio C2                   | -3.56944 | 3.92989 | 1.000 |
|            | Can Gio C3                   | -1.06944 | 3.92989 | 1.000 |
|            | Downstream of Long Tau River | -.77778  | 4.26257 | 1.000 |
|            | Downstream of Soai Rap River | 2.77778  | 3.81256 | 1.000 |
|            | Ganh Rai Gulf                | 3.47863  | 3.50704 | 1.000 |
|            | White Tiger Oilfield         | 1.84127  | 4.07579 | 1.000 |
|            | Binh Khanh                   | -5.77500 | 3.83631 | .994  |
|            | Rach La Bridge               | 3.45833  | 4.36783 | 1.000 |
|            | An Nghia Bridge              | 1.48864  | 3.75801 | 1.000 |

### Multiple Comparisons

Dependent Variable: MPs

Tukey HSD

| (I) Positon | (J) Positon | Mean Difference<br>(I-J) | Std. Error | Sig. |
|-------------|-------------|--------------------------|------------|------|
|-------------|-------------|--------------------------|------------|------|

|            |                              |          |         |       |
|------------|------------------------------|----------|---------|-------|
| Can Gio C2 | Intersection of Dong Tranh   | -4.00000 | 4.04383 | 1.000 |
|            | Ly Nhon                      | -3.41346 | 3.63426 | 1.000 |
|            | Can Thanh Wharf              | 3.50000  | 4.04383 | 1.000 |
|            | Dong Tranh Cape              | 2.45833  | 4.36783 | 1.000 |
|            | 30 April Beach               | -.33654  | 3.63426 | 1.000 |
|            | Rach ?on Bridge              | -5.64423 | 3.63426 | .991  |
|            | Loi Giang Bridge             | 1.66346  | 3.63426 | 1.000 |
|            | Long Giang Xay 2 Bridge      | -.62500  | 4.95265 | 1.000 |
|            | Dan Xay Bridge               | 1.56944  | 3.92989 | 1.000 |
|            | Dua River                    | -.12500  | 4.95265 | 1.000 |
|            | Can Gio C1                   | 3.56944  | 3.92989 | 1.000 |
|            | Can Gio C3                   | 2.50000  | 4.04383 | 1.000 |
|            | Downstream of Long Tau River | 2.79167  | 4.36783 | 1.000 |
|            | Downstream of Soai Rap River | 6.34722  | 3.92989 | .987  |
|            | Ganh Rai Gulf                | 7.04808  | 3.63426 | .921  |
|            | White Tiger Oilfield         | 5.41071  | 4.18576 | .999  |
|            | Binh Khanh                   | -8.27500 | 3.83631 | .821  |
|            | Rach La Bridge               | .95833*  | 4.36783 | 1.000 |
|            | An Nghia Bridge              | -1.01136 | 3.75801 | 1.000 |
|            | Intersection of Dong Tranh   | -6.50000 | 4.04383 | .987  |
| Can Gio C3 | Ly Nhon                      | -5.91346 | 3.63426 | .985  |
|            | Can Thanh Wharf              | 1.00000  | 4.04383 | 1.000 |
|            | Dong Tranh Cape              | -.04167  | 4.36783 | 1.000 |
|            | 30 April Beach               | -2.83654 | 3.63426 | 1.000 |
|            |                              |          |         |       |



|                         |          |         |       |
|-------------------------|----------|---------|-------|
| Rach ?on Bridge         | -8.14423 | 3.63426 | .770  |
| Loi Giang Bridge        | -.83654  | 3.63426 | 1.000 |
| Long Giang Xay 2 Bridge | -3.12500 | 4.95265 | 1.000 |

### Multiple Comparisons

Dependent Variable: MPs

Tukey HSD

| (I) Positon | (J) Positon                      | Mean Difference<br>(I-J) | Std. Error | Sig.  |
|-------------|----------------------------------|--------------------------|------------|-------|
| Can Gio C3  | Dan Xay Bridge                   | -.93056                  | 3.92989    | 1.000 |
|             | Dua River                        | -2.62500                 | 4.95265    | 1.000 |
|             | Can Gio C1                       | 1.06944                  | 3.92989    | 1.000 |
|             | Can Gio C2                       | -2.50000                 | 4.04383    | 1.000 |
|             | Downstream of Long Tau River     | .29167                   | 4.36783    | 1.000 |
|             | Downstream of Soai Rap River     | 3.84722                  | 3.92989    | 1.000 |
|             | Ganh Rai Gulf                    | 4.54808                  | 3.63426    | .999  |
|             | White Tiger Oilfield             | 2.91071                  | 4.18576    | 1.000 |
|             | Binh Khanh                       | -8.56667                 | 4.17645    | .876  |
|             | Rach La Bridge                   | .66667                   | 4.66941    | 1.000 |
|             | An Nghia Bridge                  | -1.30303                 | 4.10464    | 1.000 |
|             | Intersection of Dong Tranh River | -6.79167                 | 4.36783    | .991  |
|             | Ly Nhon                          | -6.20513                 | 3.99165    | .991  |
|             | Can Thanh Wharf                  | .70833                   | 4.36783    | 1.000 |
|             | Dong Tranh Cape                  | -.33333                  | 4.66941    | 1.000 |

|                              |           |         |       |
|------------------------------|-----------|---------|-------|
| 30 April Beach               | -3.12821  | 3.99165 | 1.000 |
| Rach ?on Bridge              | -8.43590  | 3.99165 | .845  |
| Loi Giang Bridge             | -1.12821* | 3.99165 | 1.000 |
| Long Giang Xay 2 Bridge      | -3.41667  | 5.22056 | 1.000 |
| Dan Xay Bridge               | -1.22222  | 4.26257 | 1.000 |
| Dua River                    | -2.91667  | 5.22056 | 1.000 |
| Can Gio C1                   | .77778    | 4.26257 | 1.000 |
| Can Gio C2                   | -2.79167  | 4.36783 | 1.000 |
| Can Gio C3                   | -.29167   | 4.36783 | 1.000 |
| Downstream of Soai Rap River | 3.55556   | 4.26257 | 1.000 |
| Ganh Rai Gulf                | 4.25641   | 3.99165 | 1.000 |
| White Tiger Oilfield         | 2.61905   | 4.49955 | 1.000 |

**Multiple Comparisons**

Dependent Variable: MPs

Tukey HSD

| (I) Positon                  | (J) Positon                | Mean Difference<br>(I-J) | Std. Error | Sig.  |
|------------------------------|----------------------------|--------------------------|------------|-------|
| Downstream of Soai Rap River | Binh Khanh                 | -12.12222                | 3.71602    | .131  |
|                              | Rach La Bridge             | -2.88889                 | 4.26257    | 1.000 |
|                              | An Nghia Bridge            | -4.85859                 | 3.63513    | .999  |
|                              | Intersection of Dong Tranh | -10.34722                | 3.92989    | .485  |
|                              | Ly Nhon                    | -9.76068                 | 3.50704    | .378  |
|                              | Can Thanh Wharf            | -2.84722                 | 3.92989    | 1.000 |
|                              | Dong Tranh Cape            | -3.88889                 | 4.26257    | 1.000 |
|                              | 30 April Beach             | -6.68376                 | 3.50704    | .932  |

|               |                              |                     |         |       |
|---------------|------------------------------|---------------------|---------|-------|
| Ganh Rai Gulf | Rach ?on Bridge              | -11.99145           | 3.50704 | .086  |
|               | Loi Giang Bridge             | -4.68376            | 3.50704 | .999  |
|               | Long Giang Xay 2 Bridge      | -6.97222            | 4.86007 | .997  |
|               | Dan Xay Bridge               | -4.77778            | 3.81256 | .999  |
|               | Dua River                    | -6.47222            | 4.86007 | .999  |
|               | Can Gio C1                   | -2.77778            | 3.81256 | 1.000 |
|               | Can Gio C2                   | -6.34722            | 3.92989 | .987  |
|               | Can Gio C3                   | -3.84722            | 3.92989 | 1.000 |
|               | Downstream of Long Tau River | -3.55556            | 4.26257 | 1.000 |
|               | Ganh Rai Gulf                | .70085 <sup>*</sup> | 3.50704 | 1.000 |
|               | White Tiger Oilfield         | -.93651             | 4.07579 | 1.000 |
|               | Binh Khanh                   | -12.82308           | 3.40185 | .030  |
|               | Rach La Bridge               | -3.58974            | 3.99165 | 1.000 |
|               | An Nghia Bridge              | -5.55944            | 3.31329 | .980  |
|               | Intersection of Dong Tranh   | -11.04808           | 3.63426 | .224  |
|               | Ly Nhon                      | -10.46154           | 3.17224 | .120  |
|               | Can Thanh Wharf              | -3.54808            | 3.63426 | 1.000 |
|               | Dong Tranh Cape              | -4.58974            | 3.99165 | 1.000 |
|               | 30 April Beach               | -7.38462            | 3.17224 | .712  |
|               | Rach ?on Bridge              | -12.69231           | 3.17224 | .014  |

### Multiple Comparisons

Dependent Variable: MPs

Tukey HSD

| (I) Positon | (J) Positon |  | Std. Error | Sig. |
|-------------|-------------|--|------------|------|
|-------------|-------------|--|------------|------|

|                      |                              | Mean Difference<br>(I-J) |         |       |
|----------------------|------------------------------|--------------------------|---------|-------|
| Ganh Rai Gulf        | Loi Giang Bridge             | -5.38462                 | 3.17224 | .977  |
|                      | Long Giang Xay 2 Bridge      | -7.67308                 | 4.62429 | .982  |
|                      | Dan Xay Bridge               | -5.47863                 | 3.50704 | .991  |
|                      | Dua River                    | -7.17308                 | 4.62429 | .991  |
|                      | Can Gio C1                   | -3.47863                 | 3.50704 | 1.000 |
|                      | Can Gio C2                   | -7.04808                 | 3.63426 | .921  |
|                      | Can Gio C3                   | -4.54808                 | 3.63426 | .999  |
|                      | Downstream of Long Tau River | -4.25641                 | 3.99165 | 1.000 |
|                      | Downstream of Soai Rap River | -.70085                  | 3.50704 | 1.000 |
|                      | White Tiger Oilfield         | -1.63736                 | 3.79155 | 1.000 |
|                      | Binh Khanh                   | -11.18571                | 3.98564 | .362  |
|                      | Rach La Bridge               | -1.95238                 | 4.49955 | 1.000 |
|                      | An Nghia Bridge              | -3.92208                 | 3.91033 | 1.000 |
|                      | Intersection of Dong Tranh   | -9.41071                 | 4.18576 | .766  |
|                      | Ly Nhon                      | -8.82418                 | 3.79155 | .713  |
|                      | Can Thanh Wharf              | -1.91071                 | 4.18576 | 1.000 |
| White Tiger Oilfield | Dong Tranh Cape              | -2.95238                 | 4.49955 | 1.000 |
|                      | 30 April Beach               | -5.74725*                | 3.79155 | .993  |
|                      | Rach ?on Bridge              | -11.05495                | 3.79155 | .293  |
|                      | Loi Giang Bridge             | -3.74725                 | 3.79155 | 1.000 |
|                      | Long Giang Xay 2 Bridge      | -6.03571                 | 5.06920 | 1.000 |
|                      | Dan Xay Bridge               | -3.84127                 | 4.07579 | 1.000 |
|                      | Dua River                    | -5.53571                 | 5.06920 | 1.000 |

|                              |          |         |       |
|------------------------------|----------|---------|-------|
| Can Gio C1                   | -1.84127 | 4.07579 | 1.000 |
| Can Gio C2                   | -5.41071 | 4.18576 | .999  |
| Can Gio C3                   | -2.91071 | 4.18576 | 1.000 |
| Downstream of Long Tau River | -2.61905 | 4.49955 | 1.000 |

### Multiple Comparisons

Dependent Variable: MPs

Tukey HSD

| (I) Positon          | (J) Positon                  | Mean Difference<br>(I-J) | Std. Error | Sig.  |
|----------------------|------------------------------|--------------------------|------------|-------|
| White Tiger Oilfield | Downstream of Soai Rap River | .93651                   | 4.07579    | 1.000 |
|                      | Ganh Rai Gulf                | 1.63736                  | 3.79155    | 1.000 |

*Table S4. Turkey's multiple comparison tests for Saigon urban canals, Can Gio and East Sea***Multiple Comparisons**

Dependent Variable: MPs

Tukey HSD

| (I) Positon            | (J) Positon                  | Mean Difference<br>(I-J) | Std. Error | Sig.  |
|------------------------|------------------------------|--------------------------|------------|-------|
| Bridge No 1            | Can Gio C3                   | 38.20833                 | 10.71815   | .128  |
|                        | Downstream of Long Tau River | 38.50000                 | 11.45819   | .218  |
|                        | Downstream of Soai Rap River | 42.05556                 | 10.45984   | .030  |
|                        | Ganh Rai Gulf                | 42.75641                 | 9.79503    | .009  |
|                        | White Tiger Oilfield         | 41.11905                 | 11.04138   | .080  |
|                        | Bridge No 1                  | -9.83333                 | 12.81064   | 1.000 |
|                        | Nhieu Loc                    | 8.50000                  | 14.03335   | 1.000 |
|                        | Hoang Hoa Tham Bridge        | 9.33333                  | 15.15775   | 1.000 |
|                        | Bui Huu Nghia Bridge         | -22.25000                | 14.03335   | 1.000 |
|                        | Thi Nghe                     | 2.25000                  | 14.03335   | 1.000 |
|                        | Bach ?ang Wharf              | 14.91667                 | 11.45819   | 1.000 |
|                        | Lo Gom Canal                 | -17.75000                | 14.03335   | 1.000 |
|                        | Tran Quang Dieu Bridge       | -8.83333                 | 12.81064   | 1.000 |
|                        | Letter Y Bridge              | -15.66667                | 12.81064   | 1.000 |
|                        | Nguyen Van Cu Bridge         | -.45455                  | 11.58766   | 1.000 |
| Tran Quang Dieu Bridge | Kenh Te Bridge               | -22.50000                | 12.15324   | .997  |
|                        | Tan Thuan II Bridge          | 8.70000                  | 11.74115   | 1.000 |
|                        | Mong Bridge                  | 2.62500                  | 12.15324   | 1.000 |
|                        | Khanh Hoi Bridge             | 9.00000                  | 15.15775   | 1.000 |

|                            |          |          |      |
|----------------------------|----------|----------|------|
| Binh Khanh                 | 20.10000 | 11.74115 | .999 |
| Rach La Bridge             | 29.33333 | 12.81064 | .933 |
| An Nghia Bridge            | 27.36364 | 11.58766 | .906 |
| Intersection of Dong Tranh | 21.87500 | 12.15324 | .998 |
| Ly Nhon                    | 22.46154 | 11.34748 | .990 |
| Can Thanh Wharf            | 29.37500 | 12.15324 | .881 |
| Dong Tranh Cape            | 28.33333 | 12.81064 | .955 |
| 30 April Beach             | 25.53846 | 11.34748 | .945 |
| Rach ?on Bridge            | 20.23077 | 11.34748 | .998 |

### Multiple Comparisons

Dependent Variable: MPs

Tukey HSD

| (I) Positon          | (J) Positon          | Mean Difference<br>(I-J) | Std. Error | Sig.  |
|----------------------|----------------------|--------------------------|------------|-------|
| Bui Huu Nghia Bridge | Bach ?ang Wharf      | 37.16667                 | 11.45819   | .285  |
|                      | Lo Gom Canal         | 4.50000                  | 14.03335   | 1.000 |
|                      | Cha Va Bridge        | 13.41667                 | 12.81064   | 1.000 |
|                      | Letter Y Bridge      | 6.58333                  | 12.81064   | 1.000 |
|                      | Nguyen Van Cu Bridge | 21.79545                 | 11.58766   | .996  |
|                      | Kenh Te Bridge       | -.25000                  | 12.15324   | 1.000 |
|                      | Tan Thuan II Bridge  | 30.95000                 | 11.74115   | .749  |
|                      | Mong Bridge          | 24.87500                 | 12.15324   | .984  |
|                      | Khanh Hoi Bridge     | 31.25000                 | 15.15775   | .982  |
|                      | Binh Khanh           | 42.35000                 | 11.74115   | .113  |

|                              |          |          |      |
|------------------------------|----------|----------|------|
| Rach La Bridge               | 51.58333 | 12.81064 | .030 |
| An Nghia Bridge              | 49.61364 | 11.58766 | .012 |
| Intersection of Dong Tranh   | 44.12500 | 12.15324 | .106 |
| Ly Nhon                      | 44.71154 | 11.34748 | .040 |
| Can Thanh Wharf              | 51.62500 | 12.15324 | .013 |
| Dong Tranh Cape              | 50.58333 | 12.81064 | .039 |
| 30 April Beach               | 47.78846 | 11.34748 | .015 |
| Rach ?on Bridge              | 42.48077 | 11.34748 | .076 |
| Loi Giang Bridge             | 49.78846 | 11.34748 | .008 |
| Long Giang Xay 2 Bridge      | 47.50000 | 14.03335 | .205 |
| Dan Xay Bridge               | 49.69444 | 11.92606 | .018 |
| Dua River                    | 48.00000 | 14.03335 | .187 |
| Can Gio C1                   | 51.69444 | 11.92606 | .010 |
| Can Gio C2                   | 48.12500 | 12.15324 | .038 |
| Can Gio C3                   | 50.62500 | 12.15324 | .018 |
| Downstream of Long Tau River | 50.91667 | 12.81064 | .036 |
| Downstream of Soai Rap River | 54.47222 | 11.92606 | .004 |
| Ganh Rai Gulf                | 55.17308 | 11.34748 | .001 |

### Multiple Comparisons

Dependent Variable: MPs

Tukey HSD

| (I) Positon | (J) Positon | Mean Difference<br>(I-J) | Std. Error | Sig. |
|-------------|-------------|--------------------------|------------|------|
|             |             |                          |            |      |



|                      |                            |           |          |       |
|----------------------|----------------------------|-----------|----------|-------|
| Bui Huu Nghia Bridge | White Tiger Oilfield       | 53.53571  | 12.43924 | .011  |
|                      | Bridge No 1                | -12.08333 | 12.81064 | 1.000 |
|                      | Tran Quang Dieu Bridge     | -2.25000  | 14.03335 | 1.000 |
|                      | Nhieu Loc                  | 6.25000   | 14.03335 | 1.000 |
|                      | Hoang Hoa Tham Bridge      | 7.08333   | 15.15775 | 1.000 |
|                      | Bui Huu Nghia Bridge       | -24.50000 | 14.03335 | .999  |
|                      | Bach ?ang Wharf            | 12.66667  | 11.45819 | 1.000 |
|                      | Lo Gom Canal               | -20.00000 | 14.03335 | 1.000 |
|                      | Cha Va Bridge              | -11.08333 | 12.81064 | 1.000 |
|                      | Letter Y Bridge            | -17.91667 | 12.81064 | 1.000 |
|                      | Nguyen Van Cu Bridge       | -2.70455  | 11.58766 | 1.000 |
|                      | Kenh Te Bridge             | -24.75000 | 12.15324 | .985  |
|                      | Tan Thuan II Bridge        | 6.45000   | 11.74115 | 1.000 |
| Thi Nghe             | Mong Bridge                | .37500    | 12.15324 | 1.000 |
|                      | Khanh Hoi Bridge           | 6.75000   | 15.15775 | 1.000 |
|                      | Binh Khanh                 | 17.85000  | 11.74115 | 1.000 |
|                      | Rach La Bridge             | 27.08333  | 12.81064 | .975  |
|                      | An Nghia Bridge            | 25.11364  | 11.58766 | .965  |
|                      | Intersection of Dong Tranh | 19.62500  | 12.15324 | 1.000 |
|                      | Ly Nhon                    | 20.21154  | 11.34748 | .998  |
|                      | Can Thanh Wharf            | 27.12500  | 12.15324 | .950  |
|                      | Dong Tranh Cape            | 26.08333  | 12.81064 | .985  |
|                      | 30 April Beach             | 23.28846  | 11.34748 | .983  |
|                      | Rach ?on Bridge            | 17.98077  | 11.34748 | 1.000 |
|                      | Loi Giang Bridge           | 25.28846  | 11.34748 | .951  |
|                      | Long Giang Xay 2 Bridge    | 23.00000  | 14.03335 | 1.000 |

|                |          |          |      |
|----------------|----------|----------|------|
| Dan Xay Bridge | 25.19444 | 11.92606 | .975 |
| Dua River      | 23.50000 | 14.03335 | .999 |
| Can Gio C1     | 27.19444 | 11.92606 | .936 |

### Multiple Comparisons

Dependent Variable: MPs

Tukey HSD

| (I) Positon  | (J) Positon                  | Mean Difference<br>(I-J) | Std. Error | Sig. |
|--------------|------------------------------|--------------------------|------------|------|
| Lo Gom Canal | An Nghia Bridge              | 45.11364                 | 11.58766   | .047 |
|              | Intersection of Dong Tranh   | 39.62500                 | 12.15324   | .275 |
|              | Ly Nhon                      | 40.21154                 | 11.34748   | .135 |
|              | Can Thanh Wharf              | 47.12500                 | 12.15324   | .049 |
|              | Dong Tranh Cape              | 46.08333                 | 12.81064   | .116 |
|              | 30 April Beach               | 43.28846                 | 11.34748   | .060 |
|              | Rach ?on Bridge              | 37.98077                 | 11.34748   | .225 |
|              | Loi Giang Bridge             | 45.28846                 | 11.34748   | .034 |
|              | Long Giang Xay 2 Bridge      | 43.00000                 | 14.03335   | .411 |
|              | Dan Xay Bridge               | 45.19444                 | 11.92606   | .065 |
|              | Dua River                    | 43.50000                 | 14.03335   | .384 |
|              | Can Gio C1                   | 47.19444                 | 11.92606   | .038 |
|              | Can Gio C2                   | 43.62500                 | 12.15324   | .119 |
|              | Can Gio C3                   | 46.12500                 | 12.15324   | .064 |
|              | Downstream of Long Tau River | 46.41667                 | 12.81064   | .108 |

|               |                              |           |          |       |
|---------------|------------------------------|-----------|----------|-------|
| Cha Va Bridge | Downstream of Soai Rap River | 49.97222  | 11.92606 | .017  |
|               | Ganh Rai Gulf                | 50.67308  | 11.34748 | .006  |
|               | White Tiger Oilfield         | 49.03571  | 12.43924 | .040  |
|               | Bridge No 1                  | -1.00000  | 11.45819 | 1.000 |
|               | Tran Quang Dieu Bridge       | 8.83333   | 12.81064 | 1.000 |
|               | Nhieu Loc                    | 17.33333  | 12.81064 | 1.000 |
|               | Hoang Hoa Tham Bridge        | 18.16667  | 14.03335 | 1.000 |
|               | Bui Huu Nghia Bridge         | -13.41667 | 12.81064 | 1.000 |
|               | Thi Nghe                     | 11.08333  | 12.81064 | 1.000 |
|               | Bach ?ang Wharf              | 23.75000  | 9.92308  | .892  |
|               | Lo Gom Canal                 | -8.91667  | 12.81064 | 1.000 |
|               | Letter Y Bridge              | -6.83333  | 11.45819 | 1.000 |
|               | Nguyen Van Cu Bridge         | 8.37879   | 10.07231 | 1.000 |

### Multiple Comparisons

Dependent Variable: MPs

Tukey HSD

| (I) Positon    | (J) Positon             | Mean Difference<br>(I-J) | Std. Error | Sig. |
|----------------|-------------------------|--------------------------|------------|------|
| Kenh Te Bridge | 30 April Beach          | 48.03846                 | 8.91804    | .000 |
|                | Rach ?on Bridge         | 42.73077                 | 8.91804    | .001 |
|                | Loi Giang Bridge        | 50.03846                 | 8.91804    | .000 |
|                | Long Giang Xay 2 Bridge | 47.75000                 | 12.15324   | .042 |
|                | Dan Xay Bridge          | 49.94444                 | 9.64350    | .000 |
|                | Dua River               | 48.25000                 | 12.15324   | .036 |

|                     |                              |           |          |       |
|---------------------|------------------------------|-----------|----------|-------|
| Tan Thuan II Bridge | Can Gio C1                   | 51.94444  | 9.64350  | .000  |
|                     | Can Gio C2                   | 48.37500  | 9.92308  | .001  |
|                     | Can Gio C3                   | 50.87500  | 9.92308  | .000  |
|                     | Downstream of Long Tau River | 51.16667  | 10.71815 | .002  |
|                     | Downstream of Soai Rap River | 54.72222  | 9.64350  | .000  |
|                     | Ganh Rai Gulf                | 55.42308  | 8.91804  | .000  |
|                     | White Tiger Oilfield         | 53.78571  | 10.27136 | .000  |
|                     | Bridge No 1                  | -18.53333 | 10.24851 | .998  |
|                     | Tran Quang Dieu Bridge       | -8.70000  | 11.74115 | 1.000 |
|                     | Nhieu Loc                    | -.20000   | 11.74115 | 1.000 |
|                     | Hoang Hoa Tham Bridge        | .63333    | 13.06434 | 1.000 |
|                     | Bui Huu Nghia Bridge         | -30.95000 | 11.74115 | .749  |
|                     | Thi Nghe                     | -6.45000  | 11.74115 | 1.000 |
|                     | Bach ?ang Wharf              | 6.21667   | 8.49762  | 1.000 |
|                     | Lo Gom Canal                 | -26.45000 | 11.74115 | .944  |
|                     | Cha Va Bridge                | -17.53333 | 10.24851 | .999  |
|                     | Letter Y Bridge              | -24.36667 | 10.24851 | .899  |
|                     | Nguyen Van Cu Bridge         | -9.15455  | 8.67141  | 1.000 |
|                     | Kenh Te Bridge               | -31.20000 | 9.41386  | .243  |
|                     | Mong Bridge                  | -6.07500  | 9.41386  | 1.000 |
|                     | Khanh Hoi Bridge             | .30000    | 13.06434 | 1.000 |
|                     | Binh Khanh                   | 11.40000  | 8.87547  | 1.000 |

**Multiple Comparisons****Dependent Variable: MPs****Tukey HSD**

| (I) Positon     | (J) Positon                | Mean Difference<br>(I-J) | Std. Error | Sig.  |
|-----------------|----------------------------|--------------------------|------------|-------|
| Letter Y Bridge | Bui Huu Nghia Bridge       | -6.58333                 | 12.81064   | 1.000 |
|                 | Thi Nghe                   | 17.91667                 | 12.81064   | 1.000 |
|                 | Bach ?ang Wharf            | 30.58333                 | 9.92308    | .397  |
|                 | Lo Gom Canal               | -2.08333                 | 12.81064   | 1.000 |
|                 | Cha Va Bridge              | 6.83333                  | 11.45819   | 1.000 |
|                 | Nguyen Van Cu Bridge       | 15.21212                 | 10.07231   | 1.000 |
|                 | Kenh Te Bridge             | -6.83333                 | 10.71815   | 1.000 |
|                 | Tan Thuan II Bridge        | 24.36667                 | 10.24851   | .899  |
|                 | Mong Bridge                | 18.29167                 | 10.71815   | .999  |
|                 | Khanh Hoi Bridge           | 24.66667                 | 14.03335   | .999  |
|                 | Binh Khanh                 | 35.76667                 | 10.24851   | .156  |
|                 | Rach La Bridge             | 45.00000                 | 11.45819   | .042  |
|                 | An Nghia Bridge            | 43.03030                 | 10.07231   | .012  |
|                 | Intersection of Dong Tranh | 37.54167                 | 10.71815   | .151  |
|                 | Ly Nhon                    | 38.12821                 | 9.79503    | .047  |
|                 | Can Thanh Wharf            | 45.04167                 | 10.71815   | .016  |
|                 | Dong Tranh Cape            | 44.00000                 | 11.45819   | .056  |
|                 | 30 April Beach             | 41.20513                 | 9.79503    | .016  |
|                 | Rach ?on Bridge            | 35.89744                 | 9.79503    | .096  |
|                 | Loi Giang Bridge           | 43.20513                 | 9.79503    | .007  |

|                              |          |          |      |
|------------------------------|----------|----------|------|
| Long Giang Xay 2 Bridge      | 40.91667 | 12.81064 | .318 |
| Dan Xay Bridge               | 43.11111 | 10.45984 | .021 |
| Dua River                    | 41.41667 | 12.81064 | .292 |
| Can Gio C1                   | 45.11111 | 10.45984 | .010 |
| Can Gio C2                   | 41.54167 | 10.71815 | .050 |
| Can Gio C3                   | 44.04167 | 10.71815 | .022 |
| Downstream of Long Tau River | 44.33333 | 11.45819 | .051 |
| Downstream of Soai Rap River | 47.88889 | 10.45984 | .004 |

### Multiple Comparisons

Dependent Variable: MPs

Tukey HSD

| (I) Positon          | (J) Positon            | Mean Difference (I-J) | Std. Error | Sig.  |
|----------------------|------------------------|-----------------------|------------|-------|
| Letter Y Bridge      | Ganh Rai Gulf          | 48.58974              | 9.79503    | .001  |
|                      | White Tiger Oilfield   | 46.95238              | 11.04138   | .013  |
|                      | Bridge No 1            | -9.37879              | 10.07231   | 1.000 |
|                      | Tran Quang Dieu Bridge | .45455                | 11.58766   | 1.000 |
|                      | Nhieu Loc              | 8.95455               | 11.58766   | 1.000 |
| Nguyen Van Cu Bridge | Hoang Hoa Tham Bridge  | 9.78788               | 12.92658   | 1.000 |
|                      | Bui Huu Nghia Bridge   | -21.79545             | 11.58766   | .996  |
|                      | Thi Nghe               | 2.70455               | 11.58766   | 1.000 |
|                      | Bach ?ang Wharf        | 15.37121              | 8.28425    | .996  |

|                            |           |          |       |
|----------------------------|-----------|----------|-------|
| Lo Gom Canal               | -17.29545 | 11.58766 | 1.000 |
| Cha Va Bridge              | -8.37879  | 10.07231 | 1.000 |
| Letter Y Bridge            | -15.21212 | 10.07231 | 1.000 |
| Kenh Te Bridge             | -22.04545 | 9.22172  | .894  |
| Tan Thuan II Bridge        | 9.15455   | 8.67141  | 1.000 |
| Mong Bridge                | 3.07955   | 9.22172  | 1.000 |
| Khanh Hoi Bridge           | 9.45455   | 12.92658 | 1.000 |
| Binh Khanh                 | 20.55455  | 8.67141  | .902  |
| Rach La Bridge             | 29.78788  | 10.07231 | .495  |
| An Nghia Bridge            | 27.81818  | 8.46243  | .259  |
| Intersection of Dong Tranh | 22.32955  | 9.22172  | .879  |
| Ly Nhon                    | 22.91608  | 8.13044  | .608  |
| Can Thanh Wharf            | 29.82955  | 9.22172  | .291  |
| Dong Tranh Cape            | 28.78788  | 10.07231 | .576  |
| 30 April Beach             | 25.99301  | 8.13044  | .316  |
| Rach ?on Bridge            | 20.68531  | 8.13044  | .811  |
| Loi Giang Bridge           | 27.99301  | 8.13044  | .177  |
| Long Giang Xay 2 Bridge    | 25.70455  | 11.58766 | .954  |
| Dan Xay Bridge             | 27.89899  | 8.92019  | .364  |
| Dua River                  | 26.20455  | 11.58766 | .942  |

**Multiple Comparisons****Dependent Variable: MPs****Tukey HSD**

| (I) Positon | (J) Positon |  | Std. Error | Sig. |
|-------------|-------------|--|------------|------|
|-------------|-------------|--|------------|------|

|               |                              | Mean Difference<br>(I-J) |          |       |
|---------------|------------------------------|--------------------------|----------|-------|
| Cha Va Bridge | Kenh Te Bridge               | -13.66667                | 10.71815 | 1.000 |
|               | Tan Thuan II Bridge          | 17.53333                 | 10.24851 | .999  |
|               | Mong Bridge                  | 11.45833                 | 10.71815 | 1.000 |
|               | Khanh Hoi Bridge             | 17.83333                 | 14.03335 | 1.000 |
|               | Binh Khanh                   | 28.93333                 | 10.24851 | .604  |
|               | Rach La Bridge               | 38.16667                 | 11.45819 | .234  |
|               | An Nghia Bridge              | 36.19697                 | 10.07231 | .118  |
|               | Intersection of Dong Tranh   | 30.70833                 | 10.71815 | .570  |
|               | Ly Nhon                      | 31.29487                 | 9.79503  | .317  |
|               | Can Thanh Wharf              | 38.20833                 | 10.71815 | .128  |
|               | Dong Tranh Cape              | 37.16667                 | 11.45819 | .285  |
|               | 30 April Beach               | 34.37179                 | 9.79503  | .149  |
|               | Rach ?on Bridge              | 29.06410                 | 9.79503  | .487  |
|               | Loi Giang Bridge             | 36.37179                 | 9.79503  | .083  |
|               | Long Giang Xay 2 Bridge      | 34.08333                 | 12.81064 | .731  |
|               | Dan Xay Bridge               | 36.27778                 | 10.45984 | .166  |
|               | Dua River                    | 34.58333                 | 12.81064 | .702  |
|               | Can Gio C1                   | 38.27778                 | 10.45984 | .097  |
|               | Can Gio C2                   | 34.70833                 | 10.71815 | .289  |
|               | Can Gio C3                   | 37.20833                 | 10.71815 | .164  |
|               | Downstream of Long Tau River | 37.50000                 | 11.45819 | .267  |
|               | Downstream of Soai Rap River | 41.05556                 | 10.45984 | .042  |



|                 |                        |          |          |       |
|-----------------|------------------------|----------|----------|-------|
| Letter Y Bridge | Ganh Rai Gulf          | 41.75641 | 9.79503  | .013  |
|                 | White Tiger Oilfield   | 40.11905 | 11.04138 | .105  |
|                 | Bridge No 1            | 5.83333  | 11.45819 | 1.000 |
|                 | Tran Quang Dieu Bridge | 15.66667 | 12.81064 | 1.000 |
|                 | Nhieu Loc              | 24.16667 | 12.81064 | .995  |
|                 | Hoang Hoa Tham Bridge  | 25.00000 | 14.03335 | .998  |

### Multiple Comparisons

Dependent Variable: MPs

Tukey HSD

| (I) Positon    | (J) Positon                  | Mean Difference<br>(I-J) | Std. Error | Sig.  |
|----------------|------------------------------|--------------------------|------------|-------|
| Kenh Te Bridge | Nguyen Van Cu Bridge         | 29.89899                 | 8.92019    | .222  |
|                | Can Gio C1                   |                          |            |       |
|                | Can Gio C2                   | 26.32955                 | 9.22172    | .578  |
|                | Can Gio C3                   | 28.82955                 | 9.22172    | .365  |
|                | Downstream of Long Tau River | 29.12121                 | 10.07231   | .549  |
|                | Downstream of Soai Rap River | 32.67677                 | 8.92019    | .096  |
|                | Ganh Rai Gulf                | 33.37762                 | 8.13044    | .023  |
|                | White Tiger Oilfield         | 31.74026                 | 9.59549    | .247  |
|                | Bridge No 1                  | 12.66667                 | 10.71815   | 1.000 |
|                | Tran Quang Dieu Bridge       | 22.50000                 | 12.15324   | .997  |
|                | Nhieu Loc                    | 31.00000                 | 12.15324   | .807  |
|                | Hoang Hoa Tham Bridge        | 31.83333                 | 13.43591   | .903  |
|                | Bui Huu Nghia Bridge         | .25000                   | 12.15324   | 1.000 |

|                            |          |          |       |
|----------------------------|----------|----------|-------|
| Thi Nghe                   | 24.75000 | 12.15324 | .985  |
| Bach ?ang Wharf            | 37.41667 | 9.05849  | .021  |
| Lo Gom Canal               | 4.75000  | 12.15324 | 1.000 |
| Cha Va Bridge              | 13.66667 | 10.71815 | 1.000 |
| Letter Y Bridge            | 6.83333  | 10.71815 | 1.000 |
| Nguyen Van Cu Bridge       | 22.04545 | 9.22172  | .894  |
| Tan Thuan II Bridge        | 31.20000 | 9.41386  | .243  |
| Mong Bridge                | 25.12500 | 9.92308  | .818  |
| Khanh Hoi Bridge           | 31.50000 | 13.43591 | .913  |
| Binh Khanh                 | 42.60000 | 9.41386  | .005  |
| Rach La Bridge             | 51.83333 | 10.71815 | .001  |
| An Nghia Bridge            | 49.86364 | 9.22172  | .000  |
| Intersection of Dong Tranh | 44.37500 | 9.92308  | .006  |
| Ly Nhon                    | 44.96154 | 8.91804  | .000  |
| Can Thanh Wharf            | 51.87500 | 9.92308  | .000  |
| Dong Tranh Cape            | 50.83333 | 10.71815 | .002  |

### Multiple Comparisons

Dependent Variable: MPs

Tukey HSD

| (I) Positon | (J) Positon                | Mean Difference<br>(I-J) | Std. Error | Sig.  |
|-------------|----------------------------|--------------------------|------------|-------|
| Nhieu Loc   | Intersection of Dong Tranh | 13.37500                 | 12.15324   | 1.000 |
|             | Ly Nhon                    | 13.96154                 | 11.34748   | 1.000 |
|             | Can Thanh Wharf            | 20.87500                 | 12.15324   | .999  |

|                       |                              |           |          |       |
|-----------------------|------------------------------|-----------|----------|-------|
| Hoang Hoa Tham Bridge | Dong Tranh Cape              | 19.83333  | 12.81064 | 1.000 |
|                       | 30 April Beach               | 17.03846  | 11.34748 | 1.000 |
|                       | Rach ?on Bridge              | 11.73077  | 11.34748 | 1.000 |
|                       | Loi Giang Bridge             | 19.03846  | 11.34748 | .999  |
|                       | Long Giang Xay 2 Bridge      | 16.75000  | 14.03335 | 1.000 |
|                       | Dan Xay Bridge               | 18.94444  | 11.92606 | 1.000 |
|                       | Dua River                    | 17.25000  | 14.03335 | 1.000 |
|                       | Can Gio C1                   | 20.94444  | 11.92606 | .999  |
|                       | Can Gio C2                   | 17.37500  | 12.15324 | 1.000 |
|                       | Can Gio C3                   | 19.87500  | 12.15324 | 1.000 |
|                       | Downstream of Long Tau River | 20.16667  | 12.81064 | 1.000 |
|                       | Downstream of Soai Rap River | 23.72222  | 11.92606 | .989  |
|                       | Ganh Rai Gulf                | 24.42308  | 11.34748 | .968  |
|                       | White Tiger Oilfield         | 22.78571  | 12.43924 | .997  |
|                       | Bridge No 1                  | -19.16667 | 14.03335 | 1.000 |
|                       | Tran Quang Dieu Bridge       | -9.33333  | 15.15775 | 1.000 |
|                       | Nhieu Loc                    | -.83333   | 15.15775 | 1.000 |
|                       | Bui Huu Nghia Bridge         | -31.58333 | 15.15775 | .979  |
|                       | Thi Nghe                     | -7.08333  | 15.15775 | 1.000 |
|                       | Bach ?ang Wharf              | 5.58333   | 12.81064 | 1.000 |
|                       | Lo Gom Canal                 | -27.08333 | 15.15775 | .998  |
|                       | Cha Va Bridge                | -18.16667 | 14.03335 | 1.000 |
|                       | Letter Y Bridge              | -25.00000 | 14.03335 | .998  |
|                       | Nguyen Van Cu Bridge         | -9.78788  | 12.92658 | 1.000 |

|                |           |          |      |
|----------------|-----------|----------|------|
| Kenh Te Bridge | -31.83333 | 13.43591 | .903 |
|----------------|-----------|----------|------|

**Multiple Comparisons**

Dependent Variable: MPs

Tukey HSD

| (I) Positon           | (J) Positon                | Mean Difference<br>(I-J) | Std. Error | Sig.  |
|-----------------------|----------------------------|--------------------------|------------|-------|
| Hoang Hoa Tham Bridge | Tan Thuan II Bridge        | -.63333                  | 13.06434   | 1.000 |
|                       | Mong Bridge                | -6.70833                 | 13.43591   | 1.000 |
|                       | Khanh Hoi Bridge           | -.33333                  | 16.20432   | 1.000 |
|                       | Binh Khanh                 | 10.76667                 | 13.06434   | 1.000 |
|                       | Rach La Bridge             | 20.00000                 | 14.03335   | 1.000 |
|                       | An Nghia Bridge            | 18.03030                 | 12.92658   | 1.000 |
|                       | Intersection of Dong Tranh | 12.54167                 | 13.43591   | 1.000 |
|                       | Ly Nhon                    | 13.12821                 | 12.71172   | 1.000 |
|                       | Can Thanh Wharf            | 20.04167                 | 13.43591   | 1.000 |
|                       | Dong Tranh Cape            | 19.00000                 | 14.03335   | 1.000 |
|                       | 30 April Beach             | 16.20513                 | 12.71172   | 1.000 |
|                       | Rach ?on Bridge            | 10.89744                 | 12.71172   | 1.000 |
|                       | Loi Giang Bridge           | 18.20513                 | 12.71172   | 1.000 |
|                       | Long Giang Xay 2 Bridge    | 15.91667                 | 15.15775   | 1.000 |
|                       | Dan Xay Bridge             | 18.11111                 | 13.23077   | 1.000 |
|                       | Dua River                  | 16.41667                 | 15.15775   | 1.000 |
|                       | Can Gio C1                 | 20.11111                 | 13.23077   | 1.000 |
|                       | Can Gio C2                 | 16.54167                 | 13.43591   | 1.000 |

|                      |                              |          |          |       |
|----------------------|------------------------------|----------|----------|-------|
| Bui Huu Nghia Bridge | Can Gio C3                   | 19.04167 | 13.43591 | 1.000 |
|                      | Downstream of Long Tau River | 19.33333 | 14.03335 | 1.000 |
|                      | Downstream of Soai Rap River | 22.88889 | 13.23077 | .999  |
|                      | Ganh Rai Gulf                | 23.58974 | 12.71172 | .996  |
|                      | White Tiger Oilfield         | 21.95238 | 13.69515 | 1.000 |
|                      | Bridge No 1                  | 12.41667 | 12.81064 | 1.000 |
|                      | Tran Quang Dieu Bridge       | 22.25000 | 14.03335 | 1.000 |
|                      | Nhieu Loc                    | 30.75000 | 14.03335 | .960  |
|                      | Hoang Hoa Tham Bridge        | 31.58333 | 15.15775 | .979  |
|                      | Thi Nghe                     | 24.50000 | 14.03335 | .999  |

### Multiple Comparisons

Dependent Variable: MPs

Tukey HSD

| (I) Positon     | (J) Positon                  | Mean Difference (I-J) | Std. Error | Sig. |
|-----------------|------------------------------|-----------------------|------------|------|
| Thi Nghe        | Can Gio C2                   | 23.62500              | 12.15324   | .993 |
|                 | Can Gio C3                   | 26.12500              | 12.15324   | .969 |
|                 | Downstream of Long Tau River | 26.41667              | 12.81064   | .982 |
|                 | Downstream of Soai Rap River | 29.97222              | 11.92606   | .830 |
|                 | Ganh Rai Gulf                | 30.67308              | 11.34748   | .699 |
|                 | White Tiger Oilfield         | 29.03571              | 12.43924   | .917 |
|                 | Bridge No 1                  | -24.75000             | 9.92308    | .841 |
| Bach Đang Wharf | Bridge No 1                  | -24.75000             | 9.92308    | .841 |

|                            |           |          |       |
|----------------------------|-----------|----------|-------|
| Tran Quang Dieu Bridge     | -14.91667 | 11.45819 | 1.000 |
| Nhieu Loc                  | -6.41667  | 11.45819 | 1.000 |
| Hoang Hoa Tham Bridge      | -5.58333  | 12.81064 | 1.000 |
| Bui Huu Nghia Bridge       | -37.16667 | 11.45819 | .285  |
| Thi Nghe                   | -12.66667 | 11.45819 | 1.000 |
| Lo Gom Canal               | -32.66667 | 11.45819 | .582  |
| Cha Va Bridge              | -23.75000 | 9.92308  | .892  |
| Letter Y Bridge            | -30.58333 | 9.92308  | .397  |
| Nguyen Van Cu Bridge       | -15.37121 | 8.28425  | .996  |
| Kenh Te Bridge             | -37.41667 | 9.05849  | .021  |
| Tan Thuan II Bridge        | -6.21667  | 8.49762  | 1.000 |
| Mong Bridge                | -12.29167 | 9.05849  | 1.000 |
| Khanh Hoi Bridge           | -5.91667  | 12.81064 | 1.000 |
| Binh Khanh                 | 5.18333   | 8.49762  | 1.000 |
| Rach La Bridge             | 14.41667  | 9.92308  | 1.000 |
| An Nghia Bridge            | 12.44697  | 8.28425  | 1.000 |
| Intersection of Dong Tranh | 6.95833   | 9.05849  | 1.000 |
| Ly Nhon                    | 7.54487   | 7.94482  | 1.000 |
| Can Thanh Wharf            | 14.45833  | 9.05849  | 1.000 |
| Dong Tranh Cape            | 13.41667  | 9.92308  | 1.000 |
| 30 April Beach             | 10.62179  | 7.94482  | 1.000 |

### Multiple Comparisons

Dependent Variable: MPs

Tukey HSD

| (I) Positon     | (J) Positon                  | Mean Difference<br>(I-J) | Std. Error | Sig.  |
|-----------------|------------------------------|--------------------------|------------|-------|
| Bach ?ang Wharf | Rach ?on Bridge              | 5.31410                  | 7.94482    | 1.000 |
|                 | Loi Giang Bridge             | 12.62179                 | 7.94482    | 1.000 |
|                 | Long Giang Xay 2 Bridge      | 10.33333                 | 11.45819   | 1.000 |
|                 | Dan Xay Bridge               | 12.52778                 | 8.75133    | 1.000 |
|                 | Dua River                    | 10.83333                 | 11.45819   | 1.000 |
|                 | Can Gio C1                   | 14.52778                 | 8.75133    | 1.000 |
|                 | Can Gio C2                   | 10.95833                 | 9.05849    | 1.000 |
|                 | Can Gio C3                   | 13.45833                 | 9.05849    | 1.000 |
|                 | Downstream of Long Tau River | 13.75000                 | 9.92308    | 1.000 |
|                 | Downstream of Soai Rap River | 17.30556                 | 8.75133    | .990  |
|                 | Ganh Rai Gulf                | 18.00641                 | 7.94482    | .940  |
|                 | White Tiger Oilfield         | 16.36905                 | 9.43873    | .999  |
|                 | Bridge No 1                  | 7.91667                  | 12.81064   | 1.000 |
|                 | Tran Quang Dieu Bridge       | 17.75000                 | 14.03335   | 1.000 |
|                 | Nhieu Loc                    | 26.25000                 | 14.03335   | .996  |
|                 | Hoang Hoa Tham Bridge        | 27.08333                 | 15.15775   | .998  |
|                 | Bui Huu Nghia Bridge         | -4.50000                 | 14.03335   | 1.000 |
|                 | Thi Nghe                     | 20.00000                 | 14.03335   | 1.000 |
|                 | Bach ?ang Wharf              | 32.66667                 | 11.45819   | .582  |
|                 | Cha Va Bridge                | 8.91667                  | 12.81064   | 1.000 |
| Lo Gom Canal    | Letter Y Bridge              | 2.08333                  | 12.81064   | 1.000 |
|                 | Nguyen Van Cu Bridge         | 17.29545                 | 11.58766   | 1.000 |

|                     |          |          |       |
|---------------------|----------|----------|-------|
| Kenh Te Bridge      | -4.75000 | 12.15324 | 1.000 |
| Tan Thuan II Bridge | 26.45000 | 11.74115 | .944  |
| Mong Bridge         | 20.37500 | 12.15324 | .999  |
| Khanh Hoi Bridge    | 26.75000 | 15.15775 | .999  |
| Binh Khanh          | 37.85000 | 11.74115 | .298  |
| Rach La Bridge      | 47.08333 | 12.81064 | .093  |

### Multiple Comparisons

Dependent Variable: MPs

Tukey HSD

| (I) Positon         | (J) Positon                | Mean Difference<br>(I-J) | Std. Error | Sig.  |
|---------------------|----------------------------|--------------------------|------------|-------|
| Tan Thuan II Bridge | Rach La Bridge             | 20.63333                 | 10.24851   | .987  |
|                     | An Nghia Bridge            | 18.66364                 | 8.67141    | .968  |
|                     | Intersection of Dong Tranh | 13.17500                 | 9.41386    | 1.000 |
|                     | Ly Nhon                    | 13.76154                 | 8.34774    | 1.000 |
|                     | Can Thanh Wharf            | 20.67500                 | 9.41386    | .959  |
|                     | Dong Tranh Cape            | 19.63333                 | 10.24851   | .994  |
|                     | 30 April Beach             | 16.83846                 | 8.34774    | .987  |
|                     | Rach ?on Bridge            | 11.53077                 | 8.34774    | 1.000 |
|                     | Loi Giang Bridge           | 18.83846                 | 8.34774    | .943  |
|                     | Long Giang Xay 2 Bridge    | 16.55000                 | 11.74115   | 1.000 |
|                     | Dan Xay Bridge             | 18.74444                 | 9.11868    | .983  |
|                     | Dua River                  | 17.05000                 | 11.74115   | 1.000 |



|             |                              |           |          |       |
|-------------|------------------------------|-----------|----------|-------|
| Mong Bridge | Can Gio C1                   | 20.74444  | 9.11868  | .938  |
|             | Can Gio C2                   | 17.17500  | 9.41386  | .997  |
|             | Can Gio C3                   | 19.67500  | 9.41386  | .978  |
|             | Downstream of Long Tau River | 19.96667  | 10.24851 | .992  |
|             | Downstream of Soai Rap River | 23.52222  | 9.11868  | .788  |
|             | Ganh Rai Gulf                | 24.22308  | 8.34774  | .540  |
|             | White Tiger Oilfield         | 22.58571  | 9.78029  | .926  |
|             | Bridge No 1                  | -12.45833 | 10.71815 | 1.000 |
|             | Tran Quang Dieu Bridge       | -2.62500  | 12.15324 | 1.000 |
|             | Nhieu Loc                    | 5.87500   | 12.15324 | 1.000 |
|             | Hoang Hoa Tham Bridge        | 6.70833   | 13.43591 | 1.000 |
|             | Bui Huu Nghia Bridge         | -24.87500 | 12.15324 | .984  |
|             | Thi Nghe                     | -.37500   | 12.15324 | 1.000 |
|             | Bach ?ang Wharf              | 12.29167  | 9.05849  | 1.000 |
|             | Lo Gom Canal                 | -20.37500 | 12.15324 | .999  |
|             | Cha Va Bridge                | -11.45833 | 10.71815 | 1.000 |

### Multiple Comparisons

Dependent Variable: MPs

Tukey HSD

| (I) Positon | (J) Positon          | Mean Difference (I-J) | Std. Error | Sig.  |
|-------------|----------------------|-----------------------|------------|-------|
| Mong Bridge | Letter Y Bridge      | -18.29167             | 10.71815   | .999  |
|             | Nguyen Van Cu Bridge | -3.07955              | 9.22172    | 1.000 |

|                              |           |          |       |
|------------------------------|-----------|----------|-------|
| Kenh Te Bridge               | -25.12500 | 9.92308  | .818  |
| Tan Thuan II Bridge          | 6.07500   | 9.41386  | 1.000 |
| Khanh Hoi Bridge             | 6.37500   | 13.43591 | 1.000 |
| Binh Khanh                   | 17.47500  | 9.41386  | .996  |
| Rach La Bridge               | 26.70833  | 10.71815 | .842  |
| An Nghia Bridge              | 24.73864  | 9.22172  | .715  |
| Intersection of Dong Tranh   | 19.25000  | 9.92308  | .993  |
| Ly Nhon                      | 19.83654  | 8.91804  | .952  |
| Can Thanh Wharf              | 26.75000  | 9.92308  | .705  |
| Dong Tranh Cape              | 25.70833  | 10.71815 | .890  |
| 30 April Beach               | 22.91346  | 8.91804  | .795  |
| Rach ?on Bridge              | 17.60577  | 8.91804  | .991  |
| Loi Giang Bridge             | 24.91346  | 8.91804  | .628  |
| Long Giang Xay 2 Bridge      | 22.62500  | 12.15324 | .996  |
| Dan Xay Bridge               | 24.81944  | 9.64350  | .792  |
| Dua River                    | 23.12500  | 12.15324 | .995  |
| Can Gio C1                   | 26.81944  | 9.64350  | .638  |
| Can Gio C2                   | 23.25000  | 9.92308  | .914  |
| Can Gio C3                   | 25.75000  | 9.92308  | .778  |
| Downstream of Long Tau River | 26.04167  | 10.71815 | .875  |
| Downstream of Soai Rap River | 29.59722  | 9.64350  | .407  |
| Ganh Rai Gulf                | 30.29808  | 8.91804  | .199  |
| White Tiger Oilfield         | 28.66071  | 10.27136 | .631  |

|                  |                        |           |          |       |
|------------------|------------------------|-----------|----------|-------|
| Khanh Hoi Bridge | Bridge No 1            | -18.83333 | 14.03335 | 1.000 |
|                  | Tran Quang Dieu Bridge | -9.00000  | 15.15775 | 1.000 |
|                  | Nhieu Loc              | -.50000   | 15.15775 | 1.000 |

### Multiple Comparisons

Dependent Variable: MPs

Tukey HSD

| (I) Positon      | (J) Positon                | Mean Difference<br>(I-J) | Std. Error | Sig.  |
|------------------|----------------------------|--------------------------|------------|-------|
| Khanh Hoi Bridge | Hoang Hoa Tham Bridge      | .33333                   | 16.20432   | 1.000 |
|                  | Bui Huu Nghia Bridge       | -31.25000                | 15.15775   | .982  |
|                  | Thi Nghe                   | -6.75000                 | 15.15775   | 1.000 |
|                  | Bach ?ang Wharf            | 5.91667                  | 12.81064   | 1.000 |
|                  | Lo Gom Canal               | -26.75000                | 15.15775   | .999  |
|                  | Cha Va Bridge              | -17.83333                | 14.03335   | 1.000 |
|                  | Letter Y Bridge            | -24.66667                | 14.03335   | .999  |
|                  | Nguyen Van Cu Bridge       | -9.45455                 | 12.92658   | 1.000 |
|                  | Kenh Te Bridge             | -31.50000                | 13.43591   | .913  |
|                  | Tan Thuan II Bridge        | -.30000                  | 13.06434   | 1.000 |
|                  | Mong Bridge                | -6.37500                 | 13.43591   | 1.000 |
|                  | Binh Khanh                 | 11.10000                 | 13.06434   | 1.000 |
|                  | Rach La Bridge             | 20.33333                 | 14.03335   | 1.000 |
|                  | An Nghia Bridge            | 18.36364                 | 12.92658   | 1.000 |
|                  | Intersection of Dong Tranh | 12.87500                 | 13.43591   | 1.000 |

|                              |          |          |       |
|------------------------------|----------|----------|-------|
| Ly Nhon                      | 13.46154 | 12.71172 | 1.000 |
| Can Thanh Wharf              | 20.37500 | 13.43591 | 1.000 |
| Dong Tranh Cape              | 19.33333 | 14.03335 | 1.000 |
| 30 April Beach               | 16.53846 | 12.71172 | 1.000 |
| Rach ?on Bridge              | 11.23077 | 12.71172 | 1.000 |
| Loi Giang Bridge             | 18.53846 | 12.71172 | 1.000 |
| Long Giang Xay 2 Bridge      | 16.25000 | 15.15775 | 1.000 |
| Dan Xay Bridge               | 18.44444 | 13.23077 | 1.000 |
| Dua River                    | 16.75000 | 15.15775 | 1.000 |
| Can Gio C1                   | 20.44444 | 13.23077 | 1.000 |
| Can Gio C2                   | 16.87500 | 13.43591 | 1.000 |
| Can Gio C3                   | 19.37500 | 13.43591 | 1.000 |
| Downstream of Long Tau River | 19.66667 | 14.03335 | 1.000 |

### Multiple Comparisons

Dependent Variable: MPs

Tukey HSD

| (I) Positon      | (J) Positon                  | Mean Difference<br>(I-J) | Std. Error | Sig.  |
|------------------|------------------------------|--------------------------|------------|-------|
| Khanh Hoi Bridge | Downstream of Soai Rap River | 23.22222                 | 13.23077   | .999  |
|                  | Ganh Rai Gulf                | 23.92308                 | 12.71172   | .996  |
|                  | White Tiger Oilfield         | 22.28571                 | 13.69515   | 1.000 |
| Binh Khanh       | Bridge No 1                  | -29.93333                | 10.24851   | .525  |

|                            |           |          |       |
|----------------------------|-----------|----------|-------|
| Tran Quang Dieu Bridge     | -20.10000 | 11.74115 | .999  |
| Nhieu Loc                  | -11.60000 | 11.74115 | 1.000 |
| Hoang Hoa Tham Bridge      | -10.76667 | 13.06434 | 1.000 |
| Bui Huu Nghia Bridge       | -42.35000 | 11.74115 | .113  |
| Thi Nghe                   | -17.85000 | 11.74115 | 1.000 |
| Bach ?ang Wharf            | -5.18333  | 8.49762  | 1.000 |
| Lo Gom Canal               | -37.85000 | 11.74115 | .298  |
| Cha Va Bridge              | -28.93333 | 10.24851 | .604  |
| Letter Y Bridge            | -35.76667 | 10.24851 | .156  |
| Nguyen Van Cu Bridge       | -20.55455 | 8.67141  | .902  |
| Kenh Te Bridge             | -42.60000 | 9.41386  | .005  |
| Tan Thuan II Bridge        | -11.40000 | 8.87547  | 1.000 |
| Mong Bridge                | -17.47500 | 9.41386  | .996  |
| Khanh Hoi Bridge           | -11.10000 | 13.06434 | 1.000 |
| Rach La Bridge             | 9.23333   | 10.24851 | 1.000 |
| An Nghia Bridge            | 7.26364   | 8.67141  | 1.000 |
| Intersection of Dong Tranh | 1.77500   | 9.41386  | 1.000 |
| Ly Nhon                    | 2.36154   | 8.34774  | 1.000 |
| Can Thanh Wharf            | 9.27500   | 9.41386  | 1.000 |
| Dong Tranh Cape            | 8.23333   | 10.24851 | 1.000 |
| 30 April Beach             | 5.43846   | 8.34774  | 1.000 |
| Rach ?on Bridge            | .13077    | 8.34774  | 1.000 |
| Loi Giang Bridge           | 7.43846   | 8.34774  | 1.000 |
| Long Giang Xay 2 Bridge    | 5.15000   | 11.74115 | 1.000 |

### Multiple Comparisons

Dependent Variable: MPs

Tukey HSD

| (I) Positon    | (J) Positon                  | Mean Difference<br>(I-J) | Std. Error | Sig.  |
|----------------|------------------------------|--------------------------|------------|-------|
| Binh Khanh     | Dan Xay Bridge               | 7.34444                  | 9.11868    | 1.000 |
|                | Dua River                    | 5.65000                  | 11.74115   | 1.000 |
|                | Can Gio C1                   | 9.34444                  | 9.11868    | 1.000 |
|                | Can Gio C2                   | 5.77500                  | 9.41386    | 1.000 |
|                | Can Gio C3                   | 8.27500                  | 9.41386    | 1.000 |
|                | Downstream of Long Tau River | 8.56667                  | 10.24851   | 1.000 |
|                | Downstream of Soai Rap River | 12.12222                 | 9.11868    | 1.000 |
|                | Ganh Rai Gulf                | 12.82308                 | 8.34774    | 1.000 |
|                | White Tiger Oilfield         | 11.18571                 | 9.78029    | 1.000 |
|                | Bridge No 1                  | -39.16667                | 11.45819   | .188  |
|                | Tran Quang Dieu Bridge       | -29.33333                | 12.81064   | .933  |
|                | Nhieu Loc                    | -20.83333                | 12.81064   | 1.000 |
|                | Hoang Hoa Tham Bridge        | -20.00000                | 14.03335   | 1.000 |
|                | Bui Huu Nghia Bridge         | -51.58333                | 12.81064   | .030  |
| Rach La Bridge | Thi Nghe                     | -27.08333                | 12.81064   | .975  |
|                | Bach ?ang Wharf              | -14.41667                | 9.92308    | 1.000 |
|                | Lo Gom Canal                 | -47.08333                | 12.81064   | .093  |
|                | Cha Va Bridge                | -38.16667                | 11.45819   | .234  |
|                | Letter Y Bridge              | -45.00000                | 11.45819   | .042  |
|                | Nguyen Van Cu Bridge         | -29.78788                | 10.07231   | .495  |

|                            |           |          |       |
|----------------------------|-----------|----------|-------|
| Kenh Te Bridge             | -51.83333 | 10.71815 | .001  |
| Tan Thuan II Bridge        | -20.63333 | 10.24851 | .987  |
| Mong Bridge                | -26.70833 | 10.71815 | .842  |
| Khanh Hoi Bridge           | -20.33333 | 14.03335 | 1.000 |
| Binh Khanh                 | -9.23333  | 10.24851 | 1.000 |
| An Nghia Bridge            | -1.96970  | 10.07231 | 1.000 |
| Intersection of Dong Tranh | -7.45833  | 10.71815 | 1.000 |
| Ly Nhon                    | -6.87179  | 9.79503  | 1.000 |

### Multiple Comparisons

Dependent Variable: MPs

Tukey HSD

| (I) Positon    | (J) Positon             | Mean Difference<br>(I-J) | Std. Error | Sig.  |
|----------------|-------------------------|--------------------------|------------|-------|
| Rach La Bridge | Can Thanh Wharf         | .04167                   | 10.71815   | 1.000 |
|                | Dong Tranh Cape         | -1.00000                 | 11.45819   | 1.000 |
|                | 30 April Beach          | -3.79487                 | 9.79503    | 1.000 |
|                | Rach ?on Bridge         | -9.10256                 | 9.79503    | 1.000 |
|                | Loi Giang Bridge        | -1.79487                 | 9.79503    | 1.000 |
|                | Long Giang Xay 2 Bridge | -4.08333                 | 12.81064   | 1.000 |
|                | Dan Xay Bridge          | -1.88889                 | 10.45984   | 1.000 |
|                | Dua River               | -3.58333                 | 12.81064   | 1.000 |
|                | Can Gio C1              | .11111                   | 10.45984   | 1.000 |
|                | Can Gio C2              | -3.45833                 | 10.71815   | 1.000 |
|                | Can Gio C3              | -.95833                  | 10.71815   | 1.000 |

|                 |                              |           |          |       |
|-----------------|------------------------------|-----------|----------|-------|
| An Nghia Bridge | Downstream of Long Tau River | -.66667   | 11.45819 | 1.000 |
|                 | Downstream of Soai Rap River | 2.88889   | 10.45984 | 1.000 |
|                 | Ganh Rai Gulf                | 3.58974   | 9.79503  | 1.000 |
|                 | White Tiger Oilfield         | 1.95238   | 11.04138 | 1.000 |
|                 | Bridge No 1                  | -37.19697 | 10.07231 | .088  |
|                 | Tran Quang Dieu Bridge       | -27.36364 | 11.58766 | .906  |
|                 | Nhieu Loc                    | -18.86364 | 11.58766 | 1.000 |
|                 | Hoang Hoa Tham Bridge        | -18.03030 | 12.92658 | 1.000 |
|                 | Bui Huu Nghia Bridge         | -49.61364 | 11.58766 | .012  |
|                 | Thi Nghe                     | -25.11364 | 11.58766 | .965  |
|                 | Bach ?ang Wharf              | -12.44697 | 8.28425  | 1.000 |
|                 | Lo Gom Canal                 | -45.11364 | 11.58766 | .047  |
|                 | Cha Va Bridge                | -36.19697 | 10.07231 | .118  |
|                 | Letter Y Bridge              | -43.03030 | 10.07231 | .012  |
|                 | Nguyen Van Cu Bridge         | -27.81818 | 8.46243  | .259  |
|                 | Kenh Te Bridge               | -49.86364 | 9.22172  | .000  |
|                 | Tan Thuan II Bridge          | -18.66364 | 8.67141  | .968  |

### Multiple Comparisons

Dependent Variable: MPs

Tukey HSD

| (I) Positon     | (J) Positon | Mean Difference (I-J) | Std. Error | Sig. |
|-----------------|-------------|-----------------------|------------|------|
| An Nghia Bridge | Mong Bridge | -24.73864             | 9.22172    | .715 |



|                            |                              |           |          |       |
|----------------------------|------------------------------|-----------|----------|-------|
|                            | Khanh Hoi Bridge             | -18.36364 | 12.92658 | 1.000 |
|                            | Binh Khanh                   | -7.26364  | 8.67141  | 1.000 |
|                            | Rach La Bridge               | 1.96970   | 10.07231 | 1.000 |
|                            | Intersection of Dong Tranh   | -5.48864  | 9.22172  | 1.000 |
|                            | Ly Nhon                      | -4.90210  | 8.13044  | 1.000 |
|                            | Can Thanh Wharf              | 2.01136   | 9.22172  | 1.000 |
|                            | Dong Tranh Cape              | .96970    | 10.07231 | 1.000 |
|                            | 30 April Beach               | -1.82517  | 8.13044  | 1.000 |
|                            | Rach ?on Bridge              | -7.13287  | 8.13044  | 1.000 |
|                            | Loi Giang Bridge             | .17483    | 8.13044  | 1.000 |
|                            | Long Giang Xay 2 Bridge      | -2.11364  | 11.58766 | 1.000 |
|                            | Dan Xay Bridge               | .08081    | 8.92019  | 1.000 |
|                            | Dua River                    | -1.61364  | 11.58766 | 1.000 |
|                            | Can Gio C1                   | 2.08081   | 8.92019  | 1.000 |
|                            | Can Gio C2                   | -1.48864  | 9.22172  | 1.000 |
|                            | Can Gio C3                   | 1.01136   | 9.22172  | 1.000 |
|                            | Downstream of Long Tau River | 1.30303   | 10.07231 | 1.000 |
|                            | Downstream of Soai Rap River | 4.85859   | 8.92019  | 1.000 |
|                            | Ganh Rai Gulf                | 5.55944   | 8.13044  | 1.000 |
|                            | White Tiger Oilfield         | 3.92208   | 9.59549  | 1.000 |
|                            | Bridge No 1                  | -31.70833 | 10.71815 | .494  |
| Intersection of Dong Tranh | Tran Quang Dieu Bridge       | -21.87500 | 12.15324 | .998  |
|                            | Nhieu Loc                    | -13.37500 | 12.15324 | 1.000 |
|                            | Hoang Hoa Tham Bridge        | -12.54167 | 13.43591 | 1.000 |

|                      |           |          |       |
|----------------------|-----------|----------|-------|
| Bui Huu Nghia Bridge | -44.12500 | 12.15324 | .106  |
| Thi Nghe             | -19.62500 | 12.15324 | 1.000 |
| Bach ?ang Wharf      | -6.95833  | 9.05849  | 1.000 |

### Multiple Comparisons

Dependent Variable: MPs

Tukey HSD

| (I) Positon                | (J) Positon          | Mean Difference<br>(I-J) | Std. Error | Sig.  |
|----------------------------|----------------------|--------------------------|------------|-------|
| Intersection of Dong Tranh | Lo Gom Canal         | -39.62500                | 12.15324   | .275  |
|                            | Cha Va Bridge        | -30.70833                | 10.71815   | .570  |
|                            | Letter Y Bridge      | -37.54167                | 10.71815   | .151  |
|                            | Nguyen Van Cu Bridge | -22.32955                | 9.22172    | .879  |
|                            | Kenh Te Bridge       | -44.37500                | 9.92308    | .006  |
|                            | Tan Thuan II Bridge  | -13.17500                | 9.41386    | 1.000 |
|                            | Mong Bridge          | -19.25000                | 9.92308    | .993  |
|                            | Khanh Hoi Bridge     | -12.87500                | 13.43591   | 1.000 |
|                            | Binh Khanh           | -1.77500                 | 9.41386    | 1.000 |
|                            | Rach La Bridge       | 7.45833                  | 10.71815   | 1.000 |
|                            | An Nghia Bridge      | 5.48864                  | 9.22172    | 1.000 |
|                            | Ly Nhon              | .58654                   | 8.91804    | 1.000 |
|                            | Can Thanh Wharf      | 7.50000                  | 9.92308    | 1.000 |
|                            | Dong Tranh Cape      | 6.45833                  | 10.71815   | 1.000 |
|                            | 30 April Beach       | 3.66346                  | 8.91804    | 1.000 |
|                            | Rach ?on Bridge      | -1.64423                 | 8.91804    | 1.000 |

|         |                              |           |          |       |
|---------|------------------------------|-----------|----------|-------|
|         | Loi Giang Bridge             | 5.66346   | 8.91804  | 1.000 |
|         | Long Giang Xay 2 Bridge      | 3.37500   | 12.15324 | 1.000 |
|         | Dan Xay Bridge               | 5.56944   | 9.64350  | 1.000 |
|         | Dua River                    | 3.87500   | 12.15324 | 1.000 |
|         | Can Gio C1                   | 7.56944   | 9.64350  | 1.000 |
|         | Can Gio C2                   | 4.00000   | 9.92308  | 1.000 |
|         | Can Gio C3                   | 6.50000   | 9.92308  | 1.000 |
|         | Downstream of Long Tau River | 6.79167   | 10.71815 | 1.000 |
|         | Downstream of Soai Rap River | 10.34722  | 9.64350  | 1.000 |
|         | Ganh Rai Gulf                | 11.04808  | 8.91804  | 1.000 |
|         | White Tiger Oilfield         | 9.41071   | 10.27136 | 1.000 |
| Ly Nhon | Bridge No 1                  | -32.29487 | 9.79503  | .253  |

### Multiple Comparisons

Dependent Variable: MPs

Tukey HSD

| (I) Positon | (J) Positon            | Mean Difference (I-J) | Std. Error | Sig.  |
|-------------|------------------------|-----------------------|------------|-------|
| Ly Nhon     | Tran Quang Dieu Bridge | -22.46154             | 11.34748   | .990  |
|             | Nhieu Loc              | -13.96154             | 11.34748   | 1.000 |
|             | Hoang Hoa Tham Bridge  | -13.12821             | 12.71172   | 1.000 |
|             | Bui Huu Nghia Bridge   | -44.71154             | 11.34748   | .040  |

|                            |           |          |       |
|----------------------------|-----------|----------|-------|
| Thi Nghe                   | -20.21154 | 11.34748 | .998  |
| Bach ?ang Wharf            | -7.54487  | 7.94482  | 1.000 |
| Lo Gom Canal               | -40.21154 | 11.34748 | .135  |
| Cha Va Bridge              | -31.29487 | 9.79503  | .317  |
| Letter Y Bridge            | -38.12821 | 9.79503  | .047  |
| Nguyen Van Cu Bridge       | -22.91608 | 8.13044  | .608  |
| Kenh Te Bridge             | -44.96154 | 8.91804  | .000  |
| Tan Thuan II Bridge        | -13.76154 | 8.34774  | 1.000 |
| Mong Bridge                | -19.83654 | 8.91804  | .952  |
| Khanh Hoi Bridge           | -13.46154 | 12.71172 | 1.000 |
| Binh Khanh                 | -2.36154  | 8.34774  | 1.000 |
| Rach La Bridge             | 6.87179   | 9.79503  | 1.000 |
| An Nghia Bridge            | 4.90210   | 8.13044  | 1.000 |
| Intersection of Dong Tranh | -.58654   | 8.91804  | 1.000 |
| Can Thanh Wharf            | 6.91346   | 8.91804  | 1.000 |
| Dong Tranh Cape            | 5.87179   | 9.79503  | 1.000 |
| 30 April Beach             | 3.07692   | 7.78430  | 1.000 |
| Rach ?on Bridge            | -2.23077  | 7.78430  | 1.000 |
| Loi Giang Bridge           | 5.07692   | 7.78430  | 1.000 |
| Long Giang Xay 2 Bridge    | 2.78846   | 11.34748 | 1.000 |
| Dan Xay Bridge             | 4.98291   | 8.60587  | 1.000 |
| Dua River                  | 3.28846   | 11.34748 | 1.000 |
| Can Gio C1                 | 6.98291   | 8.60587  | 1.000 |
| Can Gio C2                 | 3.41346   | 8.91804  | 1.000 |

|            |         |         |       |
|------------|---------|---------|-------|
| Can Gio C3 | 5.91346 | 8.91804 | 1.000 |
|------------|---------|---------|-------|

**Multiple Comparisons**

Dependent Variable: MPs

Tukey HSD

| (I) Positon     | (J) Positon                  | Mean Difference<br>(I-J) | Std. Error | Sig.  |
|-----------------|------------------------------|--------------------------|------------|-------|
| Ly Nhon         | Downstream of Long Tau River | 6.20513                  | 9.79503    | 1.000 |
|                 | Downstream of Soai Rap River | 9.76068                  | 8.60587    | 1.000 |
|                 | Ganh Rai Gulf                | 10.46154                 | 7.78430    | 1.000 |
|                 | White Tiger Oilfield         | 8.82418                  | 9.30402    | 1.000 |
|                 | Bridge No 1                  | -39.20833                | 10.71815   | .098  |
|                 | Tran Quang Dieu Bridge       | -29.37500                | 12.15324   | .881  |
|                 | Nhieu Loc                    | -20.87500                | 12.15324   | .999  |
|                 | Hoang Hoa Tham Bridge        | -20.04167                | 13.43591   | 1.000 |
|                 | Bui Huu Nghia Bridge         | -51.62500                | 12.15324   | .013  |
|                 | Thi Nghe                     | -27.12500                | 12.15324   | .950  |
|                 | Bach ?ang Wharf              | -14.45833                | 9.05849    | 1.000 |
| Can Thanh Wharf | Lo Gom Canal                 | -47.12500                | 12.15324   | .049  |
|                 | Cha Va Bridge                | -38.20833                | 10.71815   | .128  |
|                 | Letter Y Bridge              | -45.04167                | 10.71815   | .016  |
|                 | Nguyen Van Cu Bridge         | -29.82955                | 9.22172    | .291  |
|                 | Kenh Te Bridge               | -51.87500                | 9.92308    | .000  |
|                 | Tan Thuan II Bridge          | -20.67500                | 9.41386    | .959  |
|                 | Mong Bridge                  | -26.75000                | 9.92308    | .705  |

|                            |           |          |       |
|----------------------------|-----------|----------|-------|
| Khanh Hoi Bridge           | -20.37500 | 13.43591 | 1.000 |
| Binh Khanh                 | -9.27500  | 9.41386  | 1.000 |
| Rach La Bridge             | -.04167   | 10.71815 | 1.000 |
| An Nghia Bridge            | -2.01136  | 9.22172  | 1.000 |
| Intersection of Dong Tranh | -7.50000  | 9.92308  | 1.000 |
| Ly Nhon                    | -6.91346  | 8.91804  | 1.000 |
| Dong Tranh Cape            | -1.04167  | 10.71815 | 1.000 |
| 30 April Beach             | -3.83654  | 8.91804  | 1.000 |
| Rach ?on Bridge            | -9.14423  | 8.91804  | 1.000 |
| Loi Giang Bridge           | -1.83654  | 8.91804  | 1.000 |

### Multiple Comparisons

Dependent Variable: MPs

Tukey HSD

| (I) Positon     | (J) Positon                  | Mean Difference<br>(I-J) | Std. Error | Sig.  |
|-----------------|------------------------------|--------------------------|------------|-------|
| Can Thanh Wharf | Long Giang Xay 2 Bridge      | -4.12500                 | 12.15324   | 1.000 |
|                 | Dan Xay Bridge               | -1.93056                 | 9.64350    | 1.000 |
|                 | Dua River                    | -3.62500                 | 12.15324   | 1.000 |
|                 | Can Gio C1                   | .06944                   | 9.64350    | 1.000 |
|                 | Can Gio C2                   | -3.50000                 | 9.92308    | 1.000 |
|                 | Can Gio C3                   | -1.00000                 | 9.92308    | 1.000 |
|                 | Downstream of Long Tau River | -.70833                  | 10.71815   | 1.000 |
|                 | Downstream of Soai Rap River | 2.84722                  | 9.64350    | 1.000 |

|                 |                        |           |          |       |
|-----------------|------------------------|-----------|----------|-------|
| Dong Tranh Cape | Ganh Rai Gulf          | 3.54808   | 8.91804  | 1.000 |
|                 | White Tiger Oilfield   | 1.91071   | 10.27136 | 1.000 |
|                 | Bridge No 1            | -38.16667 | 11.45819 | .234  |
|                 | Tran Quang Dieu Bridge | -28.33333 | 12.81064 | .955  |
|                 | Nhieu Loc              | -19.83333 | 12.81064 | 1.000 |
|                 | Hoang Hoa Tham Bridge  | -19.00000 | 14.03335 | 1.000 |
|                 | Bui Huu Nghia Bridge   | -50.58333 | 12.81064 | .039  |
|                 | Thi Nghe               | -26.08333 | 12.81064 | .985  |
|                 | Bach ?ang Wharf        | -13.41667 | 9.92308  | 1.000 |
|                 | Lo Gom Canal           | -46.08333 | 12.81064 | .116  |
|                 | Cha Va Bridge          | -37.16667 | 11.45819 | .285  |
|                 | Letter Y Bridge        | -44.00000 | 11.45819 | .056  |
|                 | Nguyen Van Cu Bridge   | -28.78788 | 10.07231 | .576  |
|                 | Kenh Te Bridge         | -50.83333 | 10.71815 | .002  |
|                 | Tan Thuan II Bridge    | -19.63333 | 10.24851 | .994  |
|                 | Mong Bridge            | -25.70833 | 10.71815 | .890  |
|                 | Khanh Hoi Bridge       | -19.33333 | 14.03335 | 1.000 |
|                 | Binh Khanh             | -8.23333  | 10.24851 | 1.000 |
|                 | Rach La Bridge         | 1.00000   | 11.45819 | 1.000 |
|                 | An Nghia Bridge        | -.96970   | 10.07231 | 1.000 |

### Multiple Comparisons

Dependent Variable: MPs

Tukey HSD

| (I) Positon | (J) Positon |  | Std. Error | Sig. |
|-------------|-------------|--|------------|------|
|-------------|-------------|--|------------|------|

|                 |                              | Mean Difference<br>(I-J) |          |       |
|-----------------|------------------------------|--------------------------|----------|-------|
| Dong Tranh Cape | Intersection of Dong Tranh   | -6.45833                 | 10.71815 | 1.000 |
|                 | Ly Nhon                      | -5.87179                 | 9.79503  | 1.000 |
|                 | Can Thanh Wharf              | 1.04167                  | 10.71815 | 1.000 |
|                 | 30 April Beach               | -2.79487                 | 9.79503  | 1.000 |
|                 | Rach ?on Bridge              | -8.10256                 | 9.79503  | 1.000 |
|                 | Loi Giang Bridge             | -.79487                  | 9.79503  | 1.000 |
|                 | Long Giang Xay 2 Bridge      | -3.08333                 | 12.81064 | 1.000 |
|                 | Dan Xay Bridge               | -.88889                  | 10.45984 | 1.000 |
|                 | Dua River                    | -2.58333                 | 12.81064 | 1.000 |
|                 | Can Gio C1                   | 1.11111                  | 10.45984 | 1.000 |
|                 | Can Gio C2                   | -2.45833                 | 10.71815 | 1.000 |
|                 | Can Gio C3                   | .04167                   | 10.71815 | 1.000 |
|                 | Downstream of Long Tau River | .33333                   | 11.45819 | 1.000 |
|                 | Downstream of Soai Rap River | 3.88889                  | 10.45984 | 1.000 |
|                 | Ganh Rai Gulf                | 4.58974                  | 9.79503  | 1.000 |
|                 | White Tiger Oilfield         | 2.95238                  | 11.04138 | 1.000 |
|                 | Bridge No 1                  | -35.37179                | 9.79503  | .112  |
|                 | Tran Quang Dieu Bridge       | -25.53846                | 11.34748 | .945  |
|                 | Nhieu Loc                    | -17.03846                | 11.34748 | 1.000 |
|                 | Hoang Hoa Tham Bridge        | -16.20513                | 12.71172 | 1.000 |
| 30 April Beach  | Bui Huu Nghia Bridge         | -47.78846                | 11.34748 | .015  |
|                 | Thi Nghe                     | -23.28846                | 11.34748 | .983  |



|                      |           |          |       |
|----------------------|-----------|----------|-------|
| Bach ?ang Wharf      | -10.62179 | 7.94482  | 1.000 |
| Lo Gom Canal         | -43.28846 | 11.34748 | .060  |
| Cha Va Bridge        | -34.37179 | 9.79503  | .149  |
| Letter Y Bridge      | -41.20513 | 9.79503  | .016  |
| Nguyen Van Cu Bridge | -25.99301 | 8.13044  | .316  |
| Kenh Te Bridge       | -48.03846 | 8.91804  | .000  |

### Multiple Comparisons

Dependent Variable: MPs

Tukey HSD

| (I) Positon    | (J) Positon                | Mean Difference<br>(I-J) | Std. Error | Sig.  |
|----------------|----------------------------|--------------------------|------------|-------|
| 30 April Beach | Tan Thuan II Bridge        | -16.83846                | 8.34774    | .987  |
|                | Mong Bridge                | -22.91346                | 8.91804    | .795  |
|                | Khanh Hoi Bridge           | -16.53846                | 12.71172   | 1.000 |
|                | Binh Khanh                 | -5.43846                 | 8.34774    | 1.000 |
|                | Rach La Bridge             | 3.79487                  | 9.79503    | 1.000 |
|                | An Nghia Bridge            | 1.82517                  | 8.13044    | 1.000 |
|                | Intersection of Dong Tranh | -3.66346                 | 8.91804    | 1.000 |
|                | Ly Nhon                    | -3.07692                 | 7.78430    | 1.000 |
|                | Can Thanh Wharf            | 3.83654                  | 8.91804    | 1.000 |
|                | Dong Tranh Cape            | 2.79487                  | 9.79503    | 1.000 |
|                | Rach ?on Bridge            | -5.30769                 | 7.78430    | 1.000 |
|                | Loi Giang Bridge           | 2.00000                  | 7.78430    | 1.000 |
|                | Long Giang Xay 2 Bridge    | -.28846                  | 11.34748   | 1.000 |

|                 |                              |           |          |       |
|-----------------|------------------------------|-----------|----------|-------|
| Rach ?on Bridge | Dan Xay Bridge               | 1.90598   | 8.60587  | 1.000 |
|                 | Dua River                    | .21154    | 11.34748 | 1.000 |
|                 | Can Gio C1                   | 3.90598   | 8.60587  | 1.000 |
|                 | Can Gio C2                   | .33654    | 8.91804  | 1.000 |
|                 | Can Gio C3                   | 2.83654   | 8.91804  | 1.000 |
|                 | Downstream of Long Tau River | 3.12821   | 9.79503  | 1.000 |
|                 | Downstream of Soai Rap River | 6.68376   | 8.60587  | 1.000 |
|                 | Ganh Rai Gulf                | 7.38462   | 7.78430  | 1.000 |
|                 | White Tiger Oilfield         | 5.74725   | 9.30402  | 1.000 |
|                 | Bridge No 1                  | -30.06410 | 9.79503  | .407  |
|                 | Tran Quang Dieu Bridge       | -20.23077 | 11.34748 | .998  |
|                 | Nhieu Loc                    | -11.73077 | 11.34748 | 1.000 |
|                 | Hoang Hoa Tham Bridge        | -10.89744 | 12.71172 | 1.000 |
|                 | Bui Huu Nghia Bridge         | -42.48077 | 11.34748 | .076  |
|                 | Thi Nghe                     | -17.98077 | 11.34748 | 1.000 |

### Multiple Comparisons

Dependent Variable: MPs

Tukey HSD

| (I) Positon     | (J) Positon     | Mean Difference (I-J) | Std. Error | Sig.  |
|-----------------|-----------------|-----------------------|------------|-------|
| Rach ?on Bridge | Bach ?ang Wharf | -5.31410              | 7.94482    | 1.000 |
|                 | Lo Gom Canal    | -37.98077             | 11.34748   | .225  |

|                              |           |          |       |
|------------------------------|-----------|----------|-------|
| Cha Va Bridge                | -29.06410 | 9.79503  | .487  |
| Letter Y Bridge              | -35.89744 | 9.79503  | .096  |
| Nguyen Van Cu Bridge         | -20.68531 | 8.13044  | .811  |
| Kenh Te Bridge               | -42.73077 | 8.91804  | .001  |
| Tan Thuan II Bridge          | -11.53077 | 8.34774  | 1.000 |
| Mong Bridge                  | -17.60577 | 8.91804  | .991  |
| Khanh Hoi Bridge             | -11.23077 | 12.71172 | 1.000 |
| Binh Khanh                   | -.13077   | 8.34774  | 1.000 |
| Rach La Bridge               | 9.10256   | 9.79503  | 1.000 |
| An Nghia Bridge              | 7.13287   | 8.13044  | 1.000 |
| Intersection of Dong Tranh   | 1.64423   | 8.91804  | 1.000 |
| Ly Nhon                      | 2.23077   | 7.78430  | 1.000 |
| Can Thanh Wharf              | 9.14423   | 8.91804  | 1.000 |
| Dong Tranh Cape              | 8.10256   | 9.79503  | 1.000 |
| 30 April Beach               | 5.30769   | 7.78430  | 1.000 |
| Loi Giang Bridge             | 7.30769   | 7.78430  | 1.000 |
| Long Giang Xay 2 Bridge      | 5.01923   | 11.34748 | 1.000 |
| Dan Xay Bridge               | 7.21368   | 8.60587  | 1.000 |
| Dua River                    | 5.51923   | 11.34748 | 1.000 |
| Can Gio C1                   | 9.21368   | 8.60587  | 1.000 |
| Can Gio C2                   | 5.64423   | 8.91804  | 1.000 |
| Can Gio C3                   | 8.14423   | 8.91804  | 1.000 |
| Downstream of Long Tau River | 8.43590   | 9.79503  | 1.000 |

|                              |          |         |       |
|------------------------------|----------|---------|-------|
| Downstream of Soai Rap River | 11.99145 | 8.60587 | 1.000 |
| Ganh Rai Gulf                | 12.69231 | 7.78430 | 1.000 |
| White Tiger Oilfield         | 11.05495 | 9.30402 | 1.000 |

Dependent Variable: MPs

Tukey HSD

| (I) Positon      | (J) Positon            | Mean Difference<br>(I-J) | Std. Error | Sig.  |
|------------------|------------------------|--------------------------|------------|-------|
| Loi Giang Bridge | Bridge No 1            | -37.37179                | 9.79503    | .060  |
|                  | Tran Quang Dieu Bridge | -27.53846                | 11.34748   | .877  |
|                  | Nhieu Loc              | -19.03846                | 11.34748   | .999  |
|                  | Hoang Hoa Tham Bridge  | -18.20513                | 12.71172   | 1.000 |
|                  | Bui Huu Nghia Bridge   | -49.78846                | 11.34748   | .008  |
|                  | Thi Nghe               | -25.28846                | 11.34748   | .951  |
|                  | Bach ?ang Wharf        | -12.62179                | 7.94482    | 1.000 |
|                  | Lo Gom Canal           | -45.28846                | 11.34748   | .034  |
|                  | Cha Va Bridge          | -36.37179                | 9.79503    | .083  |
|                  | Letter Y Bridge        | -43.20513                | 9.79503    | .007  |
|                  | Nguyen Van Cu Bridge   | -27.99301                | 8.13044    | .177  |
|                  | Kenh Te Bridge         | -50.03846                | 8.91804    | .000  |
|                  | Tan Thuan II Bridge    | -18.83846                | 8.34774    | .943  |
|                  | Mong Bridge            | -24.91346                | 8.91804    | .628  |
|                  | Khanh Hoi Bridge       | -18.53846                | 12.71172   | 1.000 |
|                  | Binh Khanh             | -7.43846                 | 8.34774    | 1.000 |

|                            |          |          |       |
|----------------------------|----------|----------|-------|
| Rach La Bridge             | 1.79487  | 9.79503  | 1.000 |
| An Nghia Bridge            | -.17483  | 8.13044  | 1.000 |
| Intersection of Dong Tranh | -5.66346 | 8.91804  | 1.000 |
| Ly Nhon                    | -5.07692 | 7.78430  | 1.000 |
| Can Thanh Wharf            | 1.83654  | 8.91804  | 1.000 |
| Dong Tranh Cape            | .79487   | 9.79503  | 1.000 |
| 30 April Beach             | -2.00000 | 7.78430  | 1.000 |
| Rach ?on Bridge            | -7.30769 | 7.78430  | 1.000 |
| Long Giang Xay 2 Bridge    | -2.28846 | 11.34748 | 1.000 |
| Dan Xay Bridge             | -.09402  | 8.60587  | 1.000 |
| Dua River                  | -1.78846 | 11.34748 | 1.000 |
| Can Gio C1                 | 1.90598  | 8.60587  | 1.000 |
| Can Gio C2                 | -1.66346 | 8.91804  | 1.000 |

### Multiple Comparisons

Dependent Variable: MPs

Tukey HSD

| (I) Positon      | (J) Positon                  | Mean Difference<br>(I-J) | Std. Error | Sig.  |
|------------------|------------------------------|--------------------------|------------|-------|
| Loi Giang Bridge | Can Gio C3                   | .83654                   | 8.91804    | 1.000 |
|                  | Downstream of Long Tau River | 1.12821                  | 9.79503    | 1.000 |
|                  | Downstream of Soai Rap River | 4.68376                  | 8.60587    | 1.000 |
|                  | Ganh Rai Gulf                | 5.38462                  | 7.78430    | 1.000 |
|                  | White Tiger Oilfield         | 3.74725                  | 9.30402    | 1.000 |

|                         |                            |           |          |       |
|-------------------------|----------------------------|-----------|----------|-------|
|                         | Bridge No 1                | -35.08333 | 12.81064 | .672  |
|                         | Tran Quang Dieu Bridge     | -25.25000 | 14.03335 | .998  |
|                         | Nhieu Loc                  | -16.75000 | 14.03335 | 1.000 |
|                         | Hoang Hoa Tham Bridge      | -15.91667 | 15.15775 | 1.000 |
|                         | Bui Huu Nghia Bridge       | -47.50000 | 14.03335 | .205  |
|                         | Thi Nghe                   | -23.00000 | 14.03335 | 1.000 |
|                         | Bach ?ang Wharf            | -10.33333 | 11.45819 | 1.000 |
|                         | Lo Gom Canal               | -43.00000 | 14.03335 | .411  |
|                         | Cha Va Bridge              | -34.08333 | 12.81064 | .731  |
|                         | Letter Y Bridge            | -40.91667 | 12.81064 | .318  |
|                         | Nguyen Van Cu Bridge       | -25.70455 | 11.58766 | .954  |
| Long Giang Xay 2 Bridge | Kenh Te Bridge             | -47.75000 | 12.15324 | .042  |
|                         | Tan Thuan II Bridge        | -16.55000 | 11.74115 | 1.000 |
|                         | Mong Bridge                | -22.62500 | 12.15324 | .996  |
|                         | Khanh Hoi Bridge           | -16.25000 | 15.15775 | 1.000 |
|                         | Binh Khanh                 | -5.15000  | 11.74115 | 1.000 |
|                         | Rach La Bridge             | 4.08333   | 12.81064 | 1.000 |
|                         | An Nghia Bridge            | 2.11364   | 11.58766 | 1.000 |
|                         | Intersection of Dong Tranh | -3.37500  | 12.15324 | 1.000 |
|                         | Ly Nhon                    | -2.78846  | 11.34748 | 1.000 |
|                         | Can Thanh Wharf            | 4.12500   | 12.15324 | 1.000 |
|                         | Dong Tranh Cape            | 3.08333   | 12.81064 | 1.000 |
|                         | 30 April Beach             | .28846    | 11.34748 | 1.000 |

### Multiple Comparisons

Dependent Variable: MPs

Tukey HSD

| (I) Positon             | (J) Positon                  | Mean Difference<br>(I-J) | Std. Error | Sig.  |
|-------------------------|------------------------------|--------------------------|------------|-------|
| Long Giang Xay 2 Bridge | Rach ?on Bridge              | -5.01923                 | 11.34748   | 1.000 |
|                         | Loi Giang Bridge             | 2.28846                  | 11.34748   | 1.000 |
|                         | Dan Xay Bridge               | 2.19444                  | 11.92606   | 1.000 |
|                         | Dua River                    | .50000                   | 14.03335   | 1.000 |
|                         | Can Gio C1                   | 4.19444                  | 11.92606   | 1.000 |
|                         | Can Gio C2                   | .62500                   | 12.15324   | 1.000 |
|                         | Can Gio C3                   | 3.12500                  | 12.15324   | 1.000 |
|                         | Downstream of Long Tau River | 3.41667                  | 12.81064   | 1.000 |
|                         | Downstream of Soai Rap River | 6.97222                  | 11.92606   | 1.000 |
|                         | Ganh Rai Gulf                | 7.67308                  | 11.34748   | 1.000 |
|                         | White Tiger Oilfield         | 6.03571                  | 12.43924   | 1.000 |
|                         | Bridge No 1                  | -37.27778                | 10.45984   | .128  |
|                         | Tran Quang Dieu Bridge       | -27.44444                | 11.92606   | .929  |
|                         | Nhieu Loc                    | -18.94444                | 11.92606   | 1.000 |
|                         | Hoang Hoa Tham Bridge        | -18.11111                | 13.23077   | 1.000 |
| Dan Xay Bridge          | Bui Huu Nghia Bridge         | -49.69444                | 11.92606   | .018  |
|                         | Thi Nghe                     | -25.19444                | 11.92606   | .975  |
|                         | Bach ?ang Wharf              | -12.52778                | 8.75133    | 1.000 |
|                         | Lo Gom Canal                 | -45.19444                | 11.92606   | .065  |
|                         | Cha Va Bridge                | -36.27778                | 10.45984   | .166  |

|                      |           |          |       |
|----------------------|-----------|----------|-------|
| Letter Y Bridge      | -43.11111 | 10.45984 | .021  |
| Nguyen Van Cu Bridge | -27.89899 | 8.92019  | .364  |
| Kenh Te Bridge       | -49.94444 | 9.64350  | .000  |
| Tan Thuan II Bridge  | -18.74444 | 9.11868  | .983  |
| Mong Bridge          | -24.81944 | 9.64350  | .792  |
| Khanh Hoi Bridge     | -18.44444 | 13.23077 | 1.000 |
| Binh Khanh           | -7.34444  | 9.11868  | 1.000 |
| Rach La Bridge       | 1.88889   | 10.45984 | 1.000 |

### Multiple Comparisons

Dependent Variable: MPs

Tukey HSD

| (I) Positon    | (J) Positon                | Mean Difference<br>(I-J) | Std. Error | Sig.  |
|----------------|----------------------------|--------------------------|------------|-------|
| Dan Xay Bridge | An Nghia Bridge            | -.08081                  | 8.92019    | 1.000 |
|                | Intersection of Dong Tranh | -5.56944                 | 9.64350    | 1.000 |
|                | Ly Nhon                    | -4.98291                 | 8.60587    | 1.000 |
|                | Can Thanh Wharf            | 1.93056                  | 9.64350    | 1.000 |
|                | Dong Tranh Cape            | .88889                   | 10.45984   | 1.000 |
|                | 30 April Beach             | -1.90598                 | 8.60587    | 1.000 |
|                | Rach ?on Bridge            | -7.21368                 | 8.60587    | 1.000 |
|                | Loi Giang Bridge           | .09402                   | 8.60587    | 1.000 |
|                | Long Giang Xay 2 Bridge    | -2.19444                 | 11.92606   | 1.000 |
|                | Dua River                  | -1.69444                 | 11.92606   | 1.000 |
|                | Can Gio C1                 | 2.00000                  | 9.35557    | 1.000 |



|           |                              |           |          |       |
|-----------|------------------------------|-----------|----------|-------|
| Dua River | Can Gio C2                   | -1.56944  | 9.64350  | 1.000 |
|           | Can Gio C3                   | .93056    | 9.64350  | 1.000 |
|           | Downstream of Long Tau River | 1.22222   | 10.45984 | 1.000 |
|           | Downstream of Soai Rap River | 4.77778   | 9.35557  | 1.000 |
|           | Ganh Rai Gulf                | 5.47863   | 8.60587  | 1.000 |
|           | White Tiger Oilfield         | 3.84127   | 10.00152 | 1.000 |
|           | Bridge No 1                  | -35.58333 | 12.81064 | .641  |
|           | Tran Quang Dieu Bridge       | -25.75000 | 14.03335 | .997  |
|           | Nhieu Loc                    | -17.25000 | 14.03335 | 1.000 |
|           | Hoang Hoa Tham Bridge        | -16.41667 | 15.15775 | 1.000 |
|           | Bui Huu Nghia Bridge         | -48.00000 | 14.03335 | .187  |
|           | Thi Nghe                     | -23.50000 | 14.03335 | .999  |
|           | Bach ?ang Wharf              | -10.83333 | 11.45819 | 1.000 |
|           | Lo Gom Canal                 | -43.50000 | 14.03335 | .384  |
|           | Cha Va Bridge                | -34.58333 | 12.81064 | .702  |
|           | Letter Y Bridge              | -41.41667 | 12.81064 | .292  |
|           | Nguyen Van Cu Bridge         | -26.20455 | 11.58766 | .942  |

### Multiple Comparisons

Dependent Variable: MPs

Tukey HSD

| (I) Positon | (J) Positon    | Mean Difference (I-J) | Std. Error | Sig. |
|-------------|----------------|-----------------------|------------|------|
| Dua River   | Kenh Te Bridge | -48.25000             | 12.15324   | .036 |

|            |                              |           |          |       |
|------------|------------------------------|-----------|----------|-------|
|            | Tan Thuan II Bridge          | -17.05000 | 11.74115 | 1.000 |
|            | Mong Bridge                  | -23.12500 | 12.15324 | .995  |
|            | Khanh Hoi Bridge             | -16.75000 | 15.15775 | 1.000 |
|            | Binh Khanh                   | -5.65000  | 11.74115 | 1.000 |
|            | Rach La Bridge               | 3.58333   | 12.81064 | 1.000 |
|            | An Nghia Bridge              | 1.61364   | 11.58766 | 1.000 |
|            | Intersection of Dong Tranh   | -3.87500  | 12.15324 | 1.000 |
|            | Ly Nhon                      | -3.28846  | 11.34748 | 1.000 |
|            | Can Thanh Wharf              | 3.62500   | 12.15324 | 1.000 |
|            | Dong Tranh Cape              | 2.58333   | 12.81064 | 1.000 |
|            | 30 April Beach               | -.21154   | 11.34748 | 1.000 |
|            | Rach ?on Bridge              | -5.51923  | 11.34748 | 1.000 |
|            | Loi Giang Bridge             | 1.78846   | 11.34748 | 1.000 |
|            | Long Giang Xay 2 Bridge      | -.50000   | 14.03335 | 1.000 |
|            | Dan Xay Bridge               | 1.69444   | 11.92606 | 1.000 |
|            | Can Gio C1                   | 3.69444   | 11.92606 | 1.000 |
|            | Can Gio C2                   | .12500    | 12.15324 | 1.000 |
|            | Can Gio C3                   | 2.62500   | 12.15324 | 1.000 |
|            | Downstream of Long Tau River | 2.91667   | 12.81064 | 1.000 |
|            | Downstream of Soai Rap River | 6.47222   | 11.92606 | 1.000 |
|            | Ganh Rai Gulf                | 7.17308   | 11.34748 | 1.000 |
|            | White Tiger Oilfield         | 5.53571   | 12.43924 | 1.000 |
| Can Gio C1 | Bridge No 1                  | -39.27778 | 10.45984 | .073  |

|                        |           |          |       |
|------------------------|-----------|----------|-------|
| Tran Quang Dieu Bridge | -29.44444 | 11.92606 | .855  |
| Nhieu Loc              | -20.94444 | 11.92606 | .999  |
| Hoang Hoa Tham Bridge  | -20.11111 | 13.23077 | 1.000 |
| Bui Huu Nghia Bridge   | -51.69444 | 11.92606 | .010  |

### Multiple Comparisons

Dependent Variable: MPs

Tukey HSD

| (I) Positon | (J) Positon                | Mean Difference<br>(I-J) | Std. Error | Sig.  |
|-------------|----------------------------|--------------------------|------------|-------|
| Can Gio C1  | Thi Nghe                   | -27.19444                | 11.92606   | .936  |
|             | Bach ?ang Wharf            | -14.52778                | 8.75133    | 1.000 |
|             | Lo Gom Canal               | -47.19444                | 11.92606   | .038  |
|             | Cha Va Bridge              | -38.27778                | 10.45984   | .097  |
|             | Letter Y Bridge            | -45.11111                | 10.45984   | .010  |
|             | Nguyen Van Cu Bridge       | -29.89899                | 8.92019    | .222  |
|             | Kenh Te Bridge             | -51.94444                | 9.64350    | .000  |
|             | Tan Thuan II Bridge        | -20.74444                | 9.11868    | .938  |
|             | Mong Bridge                | -26.81944                | 9.64350    | .638  |
|             | Khanh Hoi Bridge           | -20.44444                | 13.23077   | 1.000 |
|             | Binh Khanh                 | -9.34444                 | 9.11868    | 1.000 |
|             | Rach La Bridge             | -.11111                  | 10.45984   | 1.000 |
|             | An Nghia Bridge            | -2.08081                 | 8.92019    | 1.000 |
|             | Intersection of Dong Tranh | -7.56944                 | 9.64350    | 1.000 |

|                              |          |          |       |
|------------------------------|----------|----------|-------|
| Ly Nhon                      | -6.98291 | 8.60587  | 1.000 |
| Can Thanh Wharf              | -.06944  | 9.64350  | 1.000 |
| Dong Tranh Cape              | -1.11111 | 10.45984 | 1.000 |
| 30 April Beach               | -3.90598 | 8.60587  | 1.000 |
| Rach ?on Bridge              | -9.21368 | 8.60587  | 1.000 |
| Loi Giang Bridge             | -1.90598 | 8.60587  | 1.000 |
| Long Giang Xay 2 Bridge      | -4.19444 | 11.92606 | 1.000 |
| Dan Xay Bridge               | -2.00000 | 9.35557  | 1.000 |
| Dua River                    | -3.69444 | 11.92606 | 1.000 |
| Can Gio C2                   | -3.56944 | 9.64350  | 1.000 |
| Can Gio C3                   | -1.06944 | 9.64350  | 1.000 |
| Downstream of Long Tau River | -.77778  | 10.45984 | 1.000 |
| Downstream of Soai Rap River | 2.77778  | 9.35557  | 1.000 |
| Ganh Rai Gulf                | 3.47863  | 8.60587  | 1.000 |

### Multiple Comparisons

Dependent Variable: MPs

Tukey HSD

| (I) Positon | (J) Positon            | Mean Difference<br>(I-J) | Std. Error | Sig.  |
|-------------|------------------------|--------------------------|------------|-------|
| Can Gio C1  | White Tiger Oilfield   | 1.84127                  | 10.00152   | 1.000 |
|             | Bridge No 1            | -35.70833                | 10.71815   | .233  |
| Can Gio C2  | Tran Quang Dieu Bridge | -25.87500                | 12.15324   | .972  |

|                            |           |          |       |
|----------------------------|-----------|----------|-------|
| Nhieu Loc                  | -17.37500 | 12.15324 | 1.000 |
| Hoang Hoa Tham Bridge      | -16.54167 | 13.43591 | 1.000 |
| Bui Huu Nghia Bridge       | -48.12500 | 12.15324 | .038  |
| Thi Nghe                   | -23.62500 | 12.15324 | .993  |
| Bach ?ang Wharf            | -10.95833 | 9.05849  | 1.000 |
| Lo Gom Canal               | -43.62500 | 12.15324 | .119  |
| Cha Va Bridge              | -34.70833 | 10.71815 | .289  |
| Letter Y Bridge            | -41.54167 | 10.71815 | .050  |
| Nguyen Van Cu Bridge       | -26.32955 | 9.22172  | .578  |
| Kenh Te Bridge             | -48.37500 | 9.92308  | .001  |
| Tan Thuan II Bridge        | -17.17500 | 9.41386  | .997  |
| Mong Bridge                | -23.25000 | 9.92308  | .914  |
| Khanh Hoi Bridge           | -16.87500 | 13.43591 | 1.000 |
| Binh Khanh                 | -5.77500  | 9.41386  | 1.000 |
| Rach La Bridge             | 3.45833   | 10.71815 | 1.000 |
| An Nghia Bridge            | 1.48864   | 9.22172  | 1.000 |
| Intersection of Dong Tranh | -4.00000  | 9.92308  | 1.000 |
| Ly Nhon                    | -3.41346  | 8.91804  | 1.000 |
| Can Thanh Wharf            | 3.50000   | 9.92308  | 1.000 |
| Dong Tranh Cape            | 2.45833   | 10.71815 | 1.000 |
| 30 April Beach             | -.33654   | 8.91804  | 1.000 |
| Rach ?on Bridge            | -5.64423  | 8.91804  | 1.000 |
| Loi Giang Bridge           | 1.66346   | 8.91804  | 1.000 |
| Long Giang Xay 2 Bridge    | -.62500   | 12.15324 | 1.000 |
| Dan Xay Bridge             | 1.56944   | 9.64350  | 1.000 |
| Dua River                  | -.12500   | 12.15324 | 1.000 |

**Multiple Comparisons**

Dependent Variable: MPs

Tukey HSD

| (I) Positon | (J) Positon                  | Mean Difference<br>(I-J) | Std. Error | Sig.  |
|-------------|------------------------------|--------------------------|------------|-------|
| Can Gio C2  | Can Gio C1                   | 3.56944                  | 9.64350    | 1.000 |
|             | Can Gio C3                   | 2.50000                  | 9.92308    | 1.000 |
|             | Downstream of Long Tau River | 2.79167                  | 10.71815   | 1.000 |
|             | Downstream of Soai Rap River | 6.34722                  | 9.64350    | 1.000 |
|             | Ganh Rai Gulf                | 7.04808                  | 8.91804    | 1.000 |
|             | White Tiger Oilfield         | 5.41071                  | 10.27136   | 1.000 |
|             | Bridge No 1                  | -38.20833                | 10.71815   | .128  |
|             | Tran Quang Dieu Bridge       | -28.37500                | 12.15324   | .917  |
|             | Nhieu Loc                    | -19.87500                | 12.15324   | 1.000 |
|             | Hoang Hoa Tham Bridge        | -19.04167                | 13.43591   | 1.000 |
|             | Bui Huu Nghia Bridge         | -50.62500                | 12.15324   | .018  |
|             | Thi Nghe                     | -26.12500                | 12.15324   | .969  |
| Can Gio C3  | Bach ?ang Wharf              | -13.45833                | 9.05849    | 1.000 |
|             | Lo Gom Canal                 | -46.12500                | 12.15324   | .064  |
|             | Cha Va Bridge                | -37.20833                | 10.71815   | .164  |
|             | Letter Y Bridge              | -44.04167                | 10.71815   | .022  |
|             | Nguyen Van Cu Bridge         | -28.82955                | 9.22172    | .365  |
|             | Kenh Te Bridge               | -50.87500                | 9.92308    | .000  |
|             | Tan Thuan II Bridge          | -19.67500                | 9.41386    | .978  |

|                            |           |          |       |
|----------------------------|-----------|----------|-------|
| Mong Bridge                | -25.75000 | 9.92308  | .778  |
| Khanh Hoi Bridge           | -19.37500 | 13.43591 | 1.000 |
| Binh Khanh                 | -8.27500  | 9.41386  | 1.000 |
| Rach La Bridge             | .95833    | 10.71815 | 1.000 |
| An Nghia Bridge            | -1.01136  | 9.22172  | 1.000 |
| Intersection of Dong Tranh | -6.50000  | 9.92308  | 1.000 |
| Ly Nhon                    | -5.91346  | 8.91804  | 1.000 |
| Can Thanh Wharf            | 1.00000   | 9.92308  | 1.000 |
| Dong Tranh Cape            | -.04167   | 10.71815 | 1.000 |

### Multiple Comparisons

Dependent Variable: MPs

Tukey HSD

| (I) Positon | (J) Positon                  | Mean Difference<br>(I-J) | Std. Error | Sig.  |
|-------------|------------------------------|--------------------------|------------|-------|
| Can Gio C3  | 30 April Beach               | -2.83654                 | 8.91804    | 1.000 |
|             | Rach ?on Bridge              | -8.14423                 | 8.91804    | 1.000 |
|             | Loi Giang Bridge             | -.83654                  | 8.91804    | 1.000 |
|             | Long Giang Xay 2 Bridge      | -3.12500                 | 12.15324   | 1.000 |
|             | Dan Xay Bridge               | -.93056                  | 9.64350    | 1.000 |
|             | Dua River                    | -2.62500                 | 12.15324   | 1.000 |
|             | Can Gio C1                   | 1.06944                  | 9.64350    | 1.000 |
|             | Can Gio C2                   | -2.50000                 | 9.92308    | 1.000 |
|             | Downstream of Long Tau River | .29167                   | 10.71815   | 1.000 |

|                              |                              |           |          |       |
|------------------------------|------------------------------|-----------|----------|-------|
| Downstream of Long Tau River | Downstream of Soai Rap River | 3.84722   | 9.64350  | 1.000 |
|                              | Ganh Rai Gulf                | 4.54808   | 8.91804  | 1.000 |
|                              | White Tiger Oilfield         | 2.91071   | 10.27136 | 1.000 |
|                              | Bridge No 1                  | -38.50000 | 11.45819 | .218  |
|                              | Tran Quang Dieu Bridge       | -28.66667 | 12.81064 | .948  |
|                              | Nhieu Loc                    | -20.16667 | 12.81064 | 1.000 |
|                              | Hoang Hoa Tham Bridge        | -19.33333 | 14.03335 | 1.000 |
|                              | Bui Huu Nghia Bridge         | -50.91667 | 12.81064 | .036  |
|                              | Thi Nghe                     | -26.41667 | 12.81064 | .982  |
|                              | Bach ?ang Wharf              | -13.75000 | 9.92308  | 1.000 |
|                              | Lo Gom Canal                 | -46.41667 | 12.81064 | .108  |
|                              | Cha Va Bridge                | -37.50000 | 11.45819 | .267  |
|                              | Letter Y Bridge              | -44.33333 | 11.45819 | .051  |
|                              | Nguyen Van Cu Bridge         | -29.12121 | 10.07231 | .549  |
|                              | Kenh Te Bridge               | -51.16667 | 10.71815 | .002  |
|                              | Tan Thuan II Bridge          | -19.96667 | 10.24851 | .992  |
|                              | Mong Bridge                  | -26.04167 | 10.71815 | .875  |
|                              | Khanh Hoi Bridge             | -19.66667 | 14.03335 | 1.000 |
|                              | Binh Khanh                   | -8.56667  | 10.24851 | 1.000 |

### Multiple Comparisons

Dependent Variable: MPs

Tukey HSD

| (I) Positon | (J) Positon | Mean Difference<br>(I-J) | Std. Error | Sig. |
|-------------|-------------|--------------------------|------------|------|
|-------------|-------------|--------------------------|------------|------|



|                              |                              |           |          |       |
|------------------------------|------------------------------|-----------|----------|-------|
| Downstream of Long Tau River | Rach La Bridge               | .66667    | 11.45819 | 1.000 |
|                              | An Nghia Bridge              | -1.30303  | 10.07231 | 1.000 |
|                              | Intersection of Dong Tranh   | -6.79167  | 10.71815 | 1.000 |
|                              | Ly Nhon                      | -6.20513  | 9.79503  | 1.000 |
|                              | Can Thanh Wharf              | .70833    | 10.71815 | 1.000 |
|                              | Dong Tranh Cape              | -.33333   | 11.45819 | 1.000 |
|                              | 30 April Beach               | -3.12821  | 9.79503  | 1.000 |
|                              | Rach ?on Bridge              | -8.43590  | 9.79503  | 1.000 |
|                              | Loi Giang Bridge             | -1.12821  | 9.79503  | 1.000 |
|                              | Long Giang Xay 2 Bridge      | -3.41667  | 12.81064 | 1.000 |
|                              | Dan Xay Bridge               | -1.22222  | 10.45984 | 1.000 |
|                              | Dua River                    | -2.91667  | 12.81064 | 1.000 |
|                              | Can Gio C1                   | .77778    | 10.45984 | 1.000 |
|                              | Can Gio C2                   | -2.79167  | 10.71815 | 1.000 |
|                              | Can Gio C3                   | -.29167   | 10.71815 | 1.000 |
|                              | Downstream of Soai Rap River | 3.55556   | 10.45984 | 1.000 |
|                              | Ganh Rai Gulf                | 4.25641   | 9.79503  | 1.000 |
|                              | White Tiger Oilfield         | 2.61905   | 11.04138 | 1.000 |
|                              | Bridge No 1                  | -42.05556 | 10.45984 | .030  |
|                              | Tran Quang Dieu Bridge       | -32.22222 | 11.92606 | .700  |
| Downstream of Soai Rap River | Nhieu Loc                    | -23.72222 | 11.92606 | .989  |
|                              | Hoang Hoa Tham Bridge        | -22.88889 | 13.23077 | .999  |
|                              | Bui Huu Nghia Bridge         | -54.47222 | 11.92606 | .004  |
|                              | Thi Nghe                     | -29.97222 | 11.92606 | .830  |

|                 |           |          |      |
|-----------------|-----------|----------|------|
| Bach ?ang Wharf | -17.30556 | 8.75133  | .990 |
| Lo Gom Canal    | -49.97222 | 11.92606 | .017 |
| Cha Va Bridge   | -41.05556 | 10.45984 | .042 |
| Letter Y Bridge | -47.88889 | 10.45984 | .004 |

### Multiple Comparisons

Dependent Variable: MPs

Tukey HSD

| (I) Positon                     | (J) Positon                | Mean Difference<br>(I-J) | Std. Error | Sig.  |
|---------------------------------|----------------------------|--------------------------|------------|-------|
| Downstream of Soai Rap<br>River | Nguyen Van Cu Bridge       | -32.67677                | 8.92019    | .096  |
|                                 | Kenh Te Bridge             | -54.72222                | 9.64350    | .000  |
|                                 | Tan Thuan II Bridge        | -23.52222                | 9.11868    | .788  |
|                                 | Mong Bridge                | -29.59722                | 9.64350    | .407  |
|                                 | Khanh Hoi Bridge           | -23.22222                | 13.23077   | .999  |
|                                 | Binh Khanh                 | -12.12222                | 9.11868    | 1.000 |
|                                 | Rach La Bridge             | -2.88889                 | 10.45984   | 1.000 |
|                                 | An Nghia Bridge            | -4.85859                 | 8.92019    | 1.000 |
|                                 | Intersection of Dong Tranh | -10.34722                | 9.64350    | 1.000 |
|                                 | Ly Nhon                    | -9.76068                 | 8.60587    | 1.000 |
|                                 | Can Thanh Wharf            | -2.84722                 | 9.64350    | 1.000 |
|                                 | Dong Tranh Cape            | -3.88889                 | 10.45984   | 1.000 |
|                                 | 30 April Beach             | -6.68376                 | 8.60587    | 1.000 |
|                                 | Rach ?on Bridge            | -11.99145                | 8.60587    | 1.000 |

|               |                              |           |          |       |
|---------------|------------------------------|-----------|----------|-------|
| Ganh Rai Gulf | Loi Giang Bridge             | -4.68376  | 8.60587  | 1.000 |
|               | Long Giang Xay 2 Bridge      | -6.97222  | 11.92606 | 1.000 |
|               | Dan Xay Bridge               | -4.77778  | 9.35557  | 1.000 |
|               | Dua River                    | -6.47222  | 11.92606 | 1.000 |
|               | Can Gio C1                   | -2.77778  | 9.35557  | 1.000 |
|               | Can Gio C2                   | -6.34722  | 9.64350  | 1.000 |
|               | Can Gio C3                   | -3.84722  | 9.64350  | 1.000 |
|               | Downstream of Long Tau River | -3.55556  | 10.45984 | 1.000 |
|               | Ganh Rai Gulf                | .70085    | 8.60587  | 1.000 |
|               | White Tiger Oilfield         | -.93651   | 10.00152 | 1.000 |
|               | Bridge No 1                  | -42.75641 | 9.79503  | .009  |
|               | Tran Quang Dieu Bridge       | -32.92308 | 11.34748 | .540  |
|               | Nhieu Loc                    | -24.42308 | 11.34748 | .968  |
|               | Hoang Hoa Tham Bridge        | -23.58974 | 12.71172 | .996  |

### Multiple Comparisons

Dependent Variable: MPs

Tukey HSD

| (I) Positon   | (J) Positon          | Mean Difference<br>(I-J) | Std. Error | Sig. |
|---------------|----------------------|--------------------------|------------|------|
| Ganh Rai Gulf | Bui Huu Nghia Bridge | -55.17308                | 11.34748   | .001 |
|               | Thi Nghe             | -30.67308                | 11.34748   | .699 |
|               | Bach ?ang Wharf      | -18.00641                | 7.94482    | .940 |
|               | Lo Gom Canal         | -50.67308                | 11.34748   | .006 |

|                              |           |          |       |
|------------------------------|-----------|----------|-------|
| Cha Va Bridge                | -41.75641 | 9.79503  | .013  |
| Letter Y Bridge              | -48.58974 | 9.79503  | .001  |
| Nguyen Van Cu Bridge         | -33.37762 | 8.13044  | .023  |
| Kenh Te Bridge               | -55.42308 | 8.91804  | .000  |
| Tan Thuan II Bridge          | -24.22308 | 8.34774  | .540  |
| Mong Bridge                  | -30.29808 | 8.91804  | .199  |
| Khanh Hoi Bridge             | -23.92308 | 12.71172 | .996  |
| Binh Khanh                   | -12.82308 | 8.34774  | 1.000 |
| Rach La Bridge               | -3.58974  | 9.79503  | 1.000 |
| An Nghia Bridge              | -5.55944  | 8.13044  | 1.000 |
| Intersection of Dong Tranh   | -11.04808 | 8.91804  | 1.000 |
| Ly Nhon                      | -10.46154 | 7.78430  | 1.000 |
| Can Thanh Wharf              | -3.54808  | 8.91804  | 1.000 |
| Dong Tranh Cape              | -4.58974  | 9.79503  | 1.000 |
| 30 April Beach               | -7.38462  | 7.78430  | 1.000 |
| Rach ?on Bridge              | -12.69231 | 7.78430  | 1.000 |
| Loi Giang Bridge             | -5.38462  | 7.78430  | 1.000 |
| Long Giang Xay 2 Bridge      | -7.67308  | 11.34748 | 1.000 |
| Dan Xay Bridge               | -5.47863  | 8.60587  | 1.000 |
| Dua River                    | -7.17308  | 11.34748 | 1.000 |
| Can Gio C1                   | -3.47863  | 8.60587  | 1.000 |
| Can Gio C2                   | -7.04808  | 8.91804  | 1.000 |
| Can Gio C3                   | -4.54808  | 8.91804  | 1.000 |
| Downstream of Long Tau River | -4.25641  | 9.79503  | 1.000 |

**Multiple Comparisons**

Dependent Variable: MPs

Tukey HSD

| (I) Positon          | (J) Positon                  | Mean Difference<br>(I-J) | Std. Error | Sig.  |
|----------------------|------------------------------|--------------------------|------------|-------|
| Ganh Rai Gulf        | Downstream of Soai Rap River | -.70085                  | 8.60587    | 1.000 |
|                      | White Tiger Oilfield         | -1.63736                 | 9.30402    | 1.000 |
|                      | Bridge No 1                  | -41.11905                | 11.04138   | .080  |
|                      | Tran Quang Dieu Bridge       | -31.28571                | 12.43924   | .829  |
|                      | Nhieu Loc                    | -22.78571                | 12.43924   | .997  |
|                      | Hoang Hoa Tham Bridge        | -21.95238                | 13.69515   | 1.000 |
|                      | Bui Huu Nghia Bridge         | -53.53571                | 12.43924   | .011  |
|                      | Thi Nghe                     | -29.03571                | 12.43924   | .917  |
|                      | Bach ?ang Wharf              | -16.36905                | 9.43873    | .999  |
|                      | Lo Gom Canal                 | -49.03571                | 12.43924   | .040  |
|                      | Cha Va Bridge                | -40.11905                | 11.04138   | .105  |
| White Tiger Oilfield | Letter Y Bridge              | -46.95238                | 11.04138   | .013  |
|                      | Nguyen Van Cu Bridge         | -31.74026                | 9.59549    | .247  |
|                      | Kenh Te Bridge               | -53.78571                | 10.27136   | .000  |
|                      | Tan Thuan II Bridge          | -22.58571                | 9.78029    | .926  |
|                      | Mong Bridge                  | -28.66071                | 10.27136   | .631  |
|                      | Khanh Hoi Bridge             | -22.28571                | 13.69515   | 1.000 |
|                      | Binh Khanh                   | -11.18571                | 9.78029    | 1.000 |
|                      | Rach La Bridge               | -1.95238                 | 11.04138   | 1.000 |
|                      | An Nghia Bridge              | -3.92208                 | 9.59549    | 1.000 |
|                      | Intersection of Dong Tranh   | -9.41071                 | 10.27136   | 1.000 |

|                         |           |          |       |
|-------------------------|-----------|----------|-------|
| Ly Nhon                 | -8.82418  | 9.30402  | 1.000 |
| Can Thanh Wharf         | -1.91071  | 10.27136 | 1.000 |
| Dong Tranh Cape         | -2.95238  | 11.04138 | 1.000 |
| 30 April Beach          | -5.74725  | 9.30402  | 1.000 |
| Rach ?on Bridge         | -11.05495 | 9.30402  | 1.000 |
| Loi Giang Bridge        | -3.74725  | 9.30402  | 1.000 |
| Long Giang Xay 2 Bridge | -6.03571  | 12.43924 | 1.000 |

### Multiple Comparisons

Dependent Variable: MPs

Tukey HSD

| (I) Positon          | (J) Positon                  | Mean Difference<br>(I-J) | Std. Error | Sig.  |
|----------------------|------------------------------|--------------------------|------------|-------|
| White Tiger Oilfield | Dan Xay Bridge               | -3.84127                 | 10.00152   | 1.000 |
|                      | Dua River                    | -5.53571                 | 12.43924   | 1.000 |
|                      | Can Gio C1                   | -1.84127                 | 10.00152   | 1.000 |
|                      | Can Gio C2                   | -5.41071                 | 10.27136   | 1.000 |
|                      | Can Gio C3                   | -2.91071                 | 10.27136   | 1.000 |
|                      | Downstream of Long Tau River | -2.61905                 | 11.04138   | 1.000 |
|                      | Downstream of Soai Rap River | .93651                   | 10.00152   | 1.000 |
|                      | Ganh Rai Gulf                | 1.63736                  | 9.30402    | 1.000 |

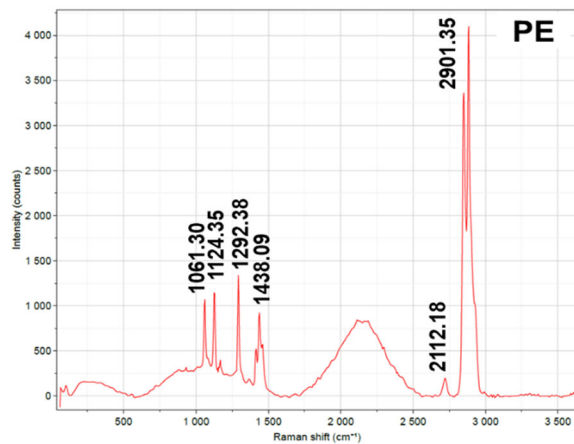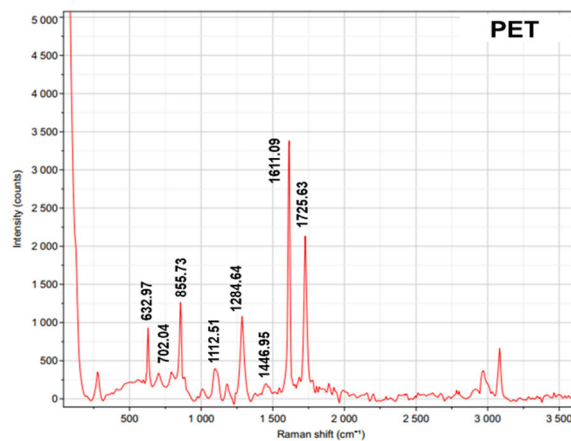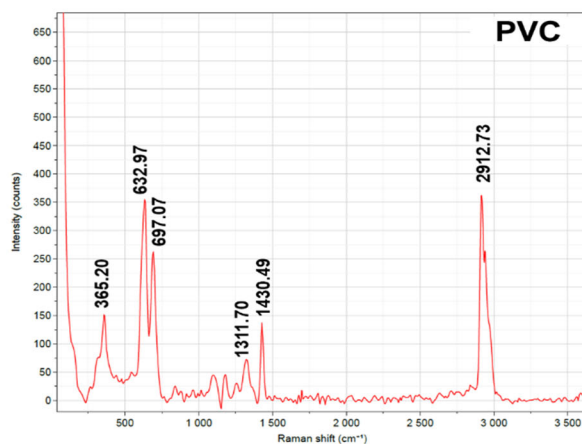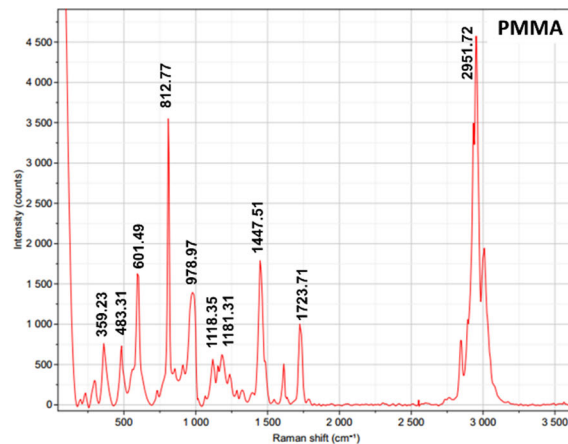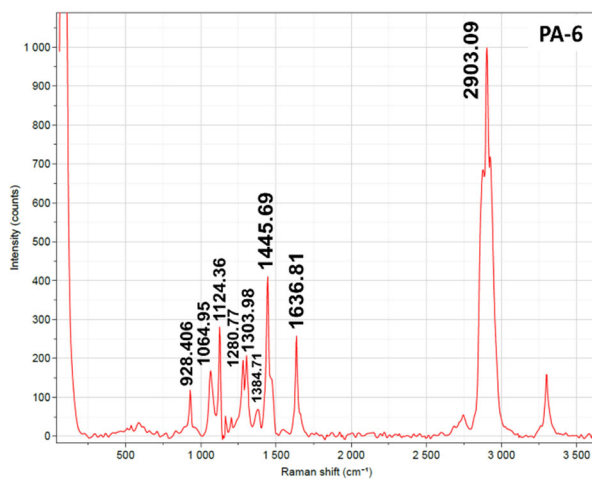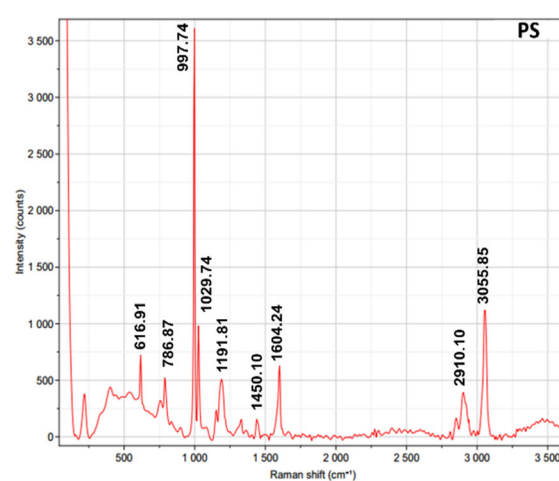

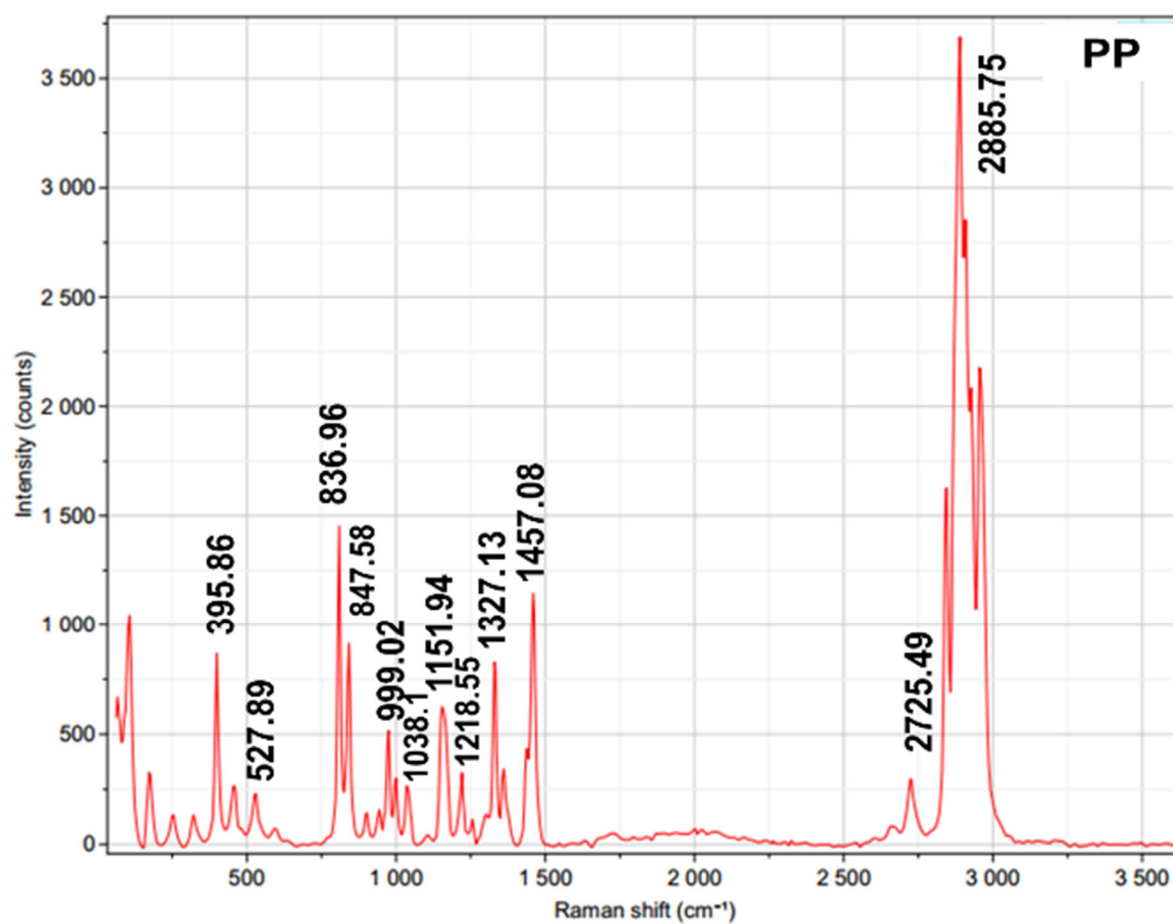

Figure S1. Raman spectra of PE, PP, PET, PVC, PS, PA and PMMA



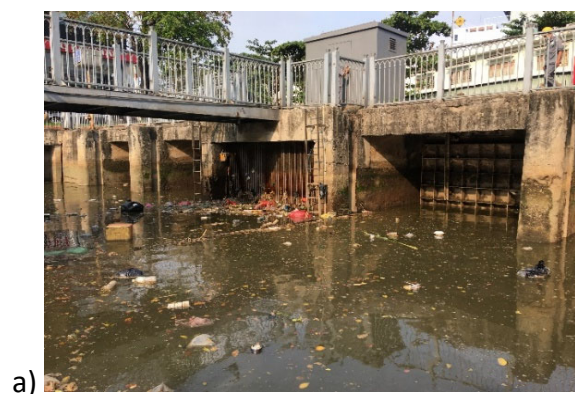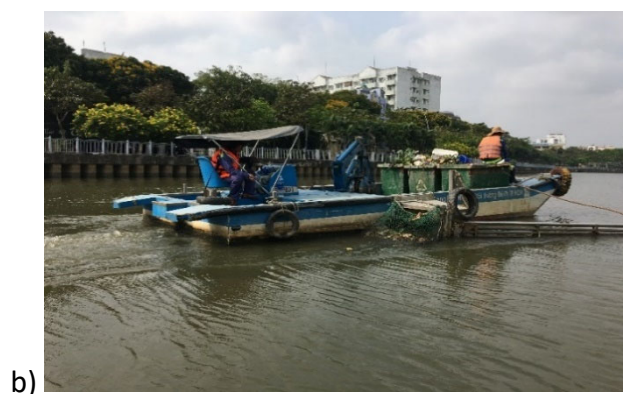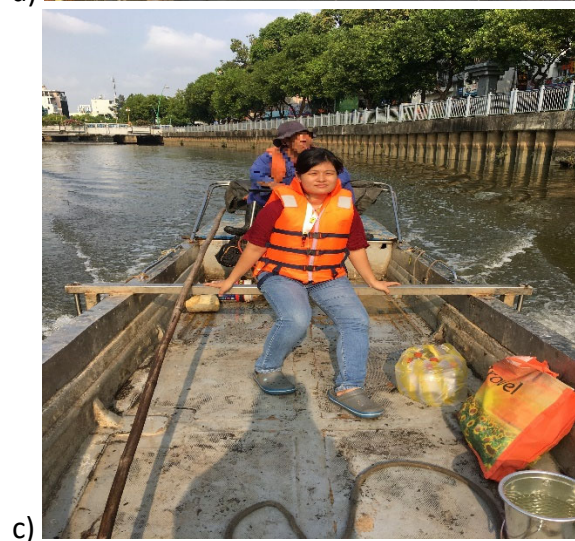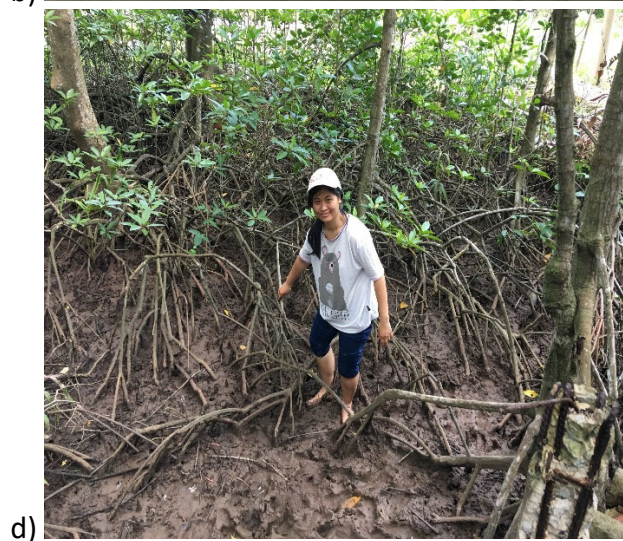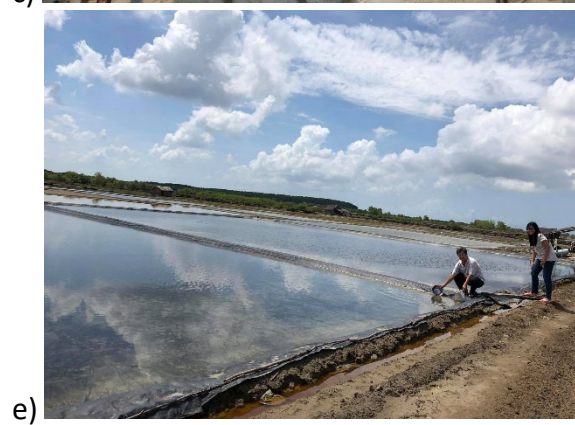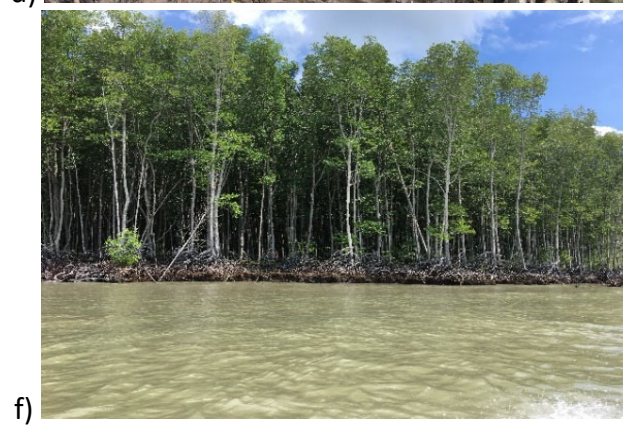

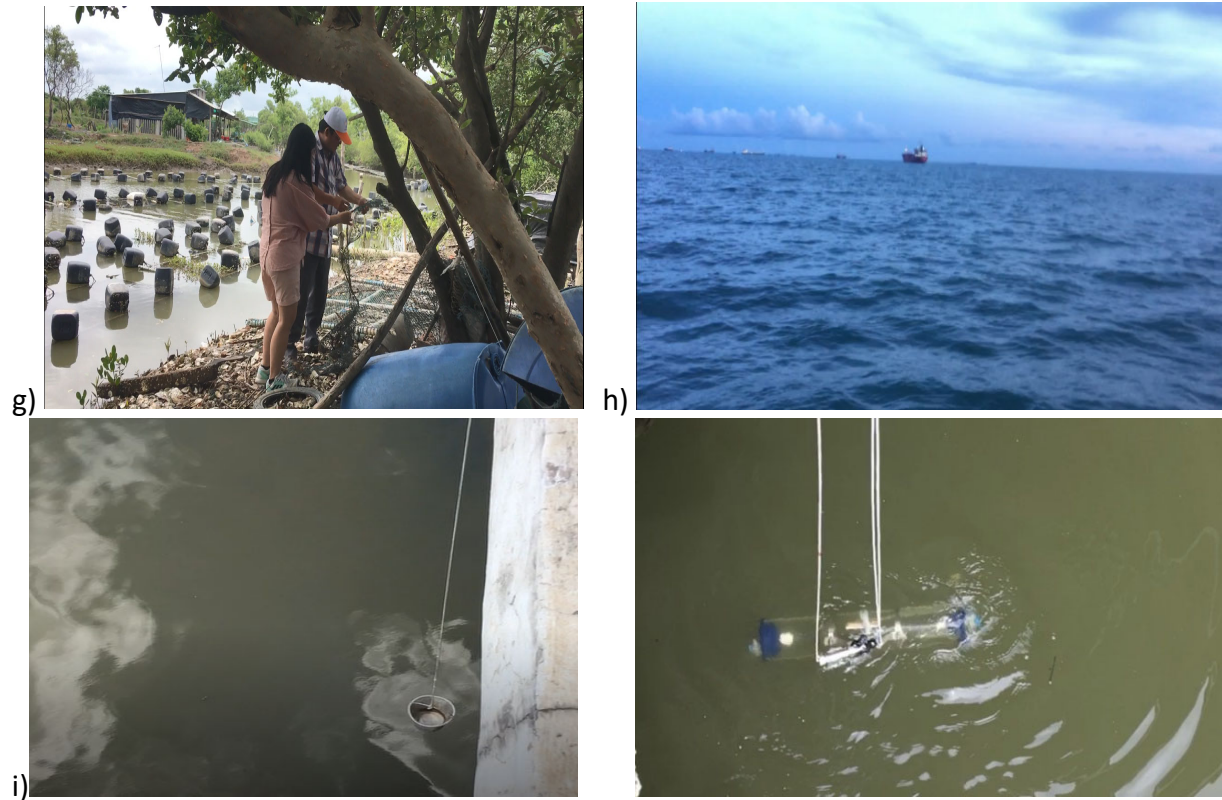

*Figure S2. Description of sampling locations and equipment*

- a) Floating garbage collection Bridge No. 1; b) Floating debris collection activities along the canals;  
c) Sampling along NL-TN by boat; d) Core Zone of Can Gio Biosphere; e) Sampling at Salt pan;  
f) Can Gio Mangrove Biosphere Reserve; g) Oyster farming in Rach Lo Bridge (Can Gio); h) Ganh Rai Gulf  
(East Sea); i) Sampling with bucket (also in (e)), and Wildco horizontal alpha water sampler*

*Source: photos taken in the field trips of MSc. Vo Thi Kim Khuyen and research team from 2019 to 2022*
